# Supplementary material for: The importance of process interactions and parameter sensitivity for modelling the carbon dynamics in a natural peatland
Source: Copernicus journal article supplement (doi:10.5194/gmd-2016-116), 2016-05-30
Supplement: Supplementary file 1 [file gmd-2016-116-supplement.pdf]

# 1 1 Supplementary tables

## 2 Table S1. Calibrated parameters

| Symbol           | Parameter Name     | Unit                                                             | Equation (cf. Table S2) | Module                                                                   | Definition                                                                                                                                                                                                                                  | Min                 | Max               | Literature or default value                                                                                                                                                           |
|------------------|--------------------|------------------------------------------------------------------|-------------------------|--------------------------------------------------------------------------|---------------------------------------------------------------------------------------------------------------------------------------------------------------------------------------------------------------------------------------------|---------------------|-------------------|---------------------------------------------------------------------------------------------------------------------------------------------------------------------------------------|
| $\Delta z_{cov}$ | CritDepthSnowCover | m                                                                | 4.7                     | Snow coverage                                                            | The thickness of mean snow height that corresponds to a complete cover of the soil.                                                                                                                                                         | $1 \cdot 10^{-3}$   | 0.02              | 0.01 (default value)                                                                                                                                                                  |
| $m_{Rmin}$       | MeltCoefGlobRad    | $\text{kg J}^{-1}$                                               | 4.10                    | Snow melt dependency on radiation                                        | Coefficient in the global radiation response of the empirical snow melt function.                                                                                                                                                           | $2.3 \cdot 10^{-7}$ | $3 \cdot 10^{-7}$ | $1.5 \cdot 10^{-7}$ (default value)                                                                                                                                                   |
| $f_{gh}$         | MeltCoefSoilHeatF  |                                                                  | 4.8                     | Snow melt dependency on soil heat                                        | Scaling coefficient for the contribution of heat flow from ground on the melting of the snow in the empirical snow melt function.                                                                                                           | 0.3                 | 0.7               | 0.5 (default value)                                                                                                                                                                   |
| $S_{dw}$         | DensityCoefMass    | $\text{m}^{-1}$                                                  | 4.5                     | Snow: density coefficient of old snow                                    | Mass coefficient in the calculation of snow density as a function of liquid and ice content in the "old" snow pack.                                                                                                                         | 0.6                 | 1                 | 0.5 (default value)                                                                                                                                                                   |
| $s_{dt}$         | DensityCoefWater   | $\text{kg m}^{-3}$                                               | 4.5                     | Snow: density dependence on liquid an ice content                        | Liquid water coefficient in the calculation of snow density as a function of liquid and ice content. The snow density increase with this value when the liquid water content in the snow pack becomes equal to the total retention capacity | 160                 | 210               | 200 (default value)                                                                                                                                                                   |
| $\rho_{smin}$    | DensityOfNewSnow   | $\text{kg m}^{-3}$                                               | 4.3                     | Snow: density of new snow                                                | Density of new snow.                                                                                                                                                                                                                        | 90                  | 120               | 100 (default value)                                                                                                                                                                   |
| $m_T$            | MeltCoefAirTemp    | $\text{kg } ^\circ\text{C}^{-1} \text{ m}^{-2} \text{ day}^{-1}$ | 4.9                     | Snow: melting dependency to temperature                                  | Coefficient for temperature dependance in the empirical snow melt function.                                                                                                                                                                 | 2.5                 | 4                 | A value of 2 is normal for forests. Similar as for MeltCoefGlobRad a two or three fold increase is expected if adaptation to an open filed is to be done (Jansson and Karlberg 2010). |
| $T_{RainL}$      | OnlyRainPrecTemp   |                                                                  | 4.4                     | Snow: temperature treshold for rain:snow                                 | Above this temperature all precipitation is rain.                                                                                                                                                                                           | 1.7                 | 2.2               | 2 (default value)                                                                                                                                                                     |
| $h_{com}$        | Common value       | $\text{mm day}^{-1}$                                             | 6.11                    | Soil hydraulic conductivity under saturated conditions                   | Unsaturated matrix conductivity dependency on total saturated conductivity                                                                                                                                                                  | 0.01                | 100               | 10 (default value)                                                                                                                                                                    |
| $\psi_a$         | Air Entry(1)       | cm                                                               | 6.8                     | Soil hydraulic properties: shape of water retention in the upper horizon | Air-entry tension. As this was the only calibrated parameter defining the shape pF-curve, it determines unsaturated water distribution in the soil including capillary rise.                                                                | 1 (3)               | 8 (10)            | Range received by comparing resulting pF curves with curves measured in peatlands (Kellner and Lundin, 2001); Values in bracket were used for soil horizons < -30 cm                  |
| $d_p$            | DrainSpacing       | m                                                                | 6.12                    | Soil hydrology: drainage distance                                        | Characteristic distance between drainage pipes, denominator when estimating the gradient necessary for the calculation of the horizontal water flow to drainage pipe                                                                        | 30                  | 330               | site specific estimation                                                                                                                                                              |

| Symbol             | Parameter Name         | Unit              | Equation (cf. Table S2) | Module                                                                        | Definition                                                                                                                                                                                                                                                                                 | Definition        |                   | Literature or default value                             |
|--------------------|------------------------|-------------------|-------------------------|-------------------------------------------------------------------------------|--------------------------------------------------------------------------------------------------------------------------------------------------------------------------------------------------------------------------------------------------------------------------------------------|-------------------|-------------------|---------------------------------------------------------|
|                    |                        |                   |                         |                                                                               |                                                                                                                                                                                                                                                                                            | Min               | Max               |                                                         |
| $g_{max,vasc}$     | ConductMax(1)          | $m^2 s^{-1}$      | 2.10                    | Transpiration efficiency                                                      | Transpiration coefficient for vascular plants: the maximal conductance of fully open stomata in the Lohammar equation (Lohammar et al., 1980) for calculating leaf conductance and surface resistance.                                                                                     | 0.02              | 0.1               | Results from a pre-study calibration with the site data |
| $g_{max,moss}$     | ConductMax(2)          | $m^2 s^{-1}$      | 2.10                    | Transpiration efficiency                                                      | Transpiration coefficient for mosses: the maximal conductance of fully open stomata in the Lohammar equation (Lohammar et al., 1980) for calculating leaf conductance and surface resistance.                                                                                              | 0.017             | 0.03              | Results from a pre-study calibration with the site data |
| $g_{maxwin}$       | CondMaxWinter          | $m s^{-1}$        | 2.10                    | Transpiration efficiency outside the growing season                           | Maximal conductance of fully open stomata to calculate the potential transpiration of plants during winter                                                                                                                                                                                 | 0.001             | 0.03              | Results from a pre-study calibration with the site data |
| $t_{WA}$           | TempCoefA              | -                 | 2.13                    | Transpiration stress due to limited water availability under low temperatures | Temperature coefficient in the temperature response function.                                                                                                                                                                                                                              | 0.8               | 10                | Results from a pre-study calibration with the site data |
| $\psi_c$           | CritThresholdDry       | cm water          | 2.12                    | Transpiration stress due to too low water content                             | Critical pressure head for reduction of potential water uptake. A wide range (100-3000 cm water) of values has been reported in the literature. Lower values are expected for sandy soils with low root densities and higher values are expected for clayey soils with high root densities | 1                 | 330               | Results from a pre-study calibration with the site data |
| $p_1$              | DemandRelCoef          | day <sup>-1</sup> | 2.12                    | Transpiration stress due to too low water content                             | Coefficient for the dependence of potential water uptake in the reduction function. The dependence of the potential uptake rate has frequently been reported as an important phenomenon for reduction of water uptake                                                                      | 0.3               | 2                 | 0.3 (default value)                                     |
| $\psi_{eg}$        | EquilAdjustPsi         | -                 | 3.7                     | Vapour pressure at the soil surface                                           | Factor to account for differences between water tension in the middle of top layer and actual vapour pressure at soil surface                                                                                                                                                              | 0                 | 2                 | 1 (default value)                                       |
| $c_{H_0,canopy}$   | WindLessExchangeCanopy | $m s^{-1}$        | 2.6                     | Aerodynamic resistance of canopy: minimum exchange under stable conditions    | Roughness length used in the calculation of $r_a$ for each plant, corresponds to $z_0$ in Equation 2.6.                                                                                                                                                                                    | $1 \cdot 10^{-4}$ | 0.1               | 0.001 (default value)                                   |
| $r_{a,max,snow-l}$ | WindlessExchangeSnow   | $s^{-1}$          |                         | Aerodynamic resistance of snow: minimum exchange under stable conditions      | Minimum turbulent exchange coefficient (inverse of maximum allowed aerodynamic resistance) over snow. Avoids exaggerated surface cooling in windless conditions or extreme stable stratification.                                                                                          | 0                 | $1 \cdot 10^{-4}$ | Results from a pre-study calibration with the site data |

| Symbol              | Parameter Name      | Unit                             | Equation (cf. Table S2) | Module                                           | Definition                                                                                                                  | Definition          |                      | Literature or default value                                                                                                                                                                                                                                                         |
|---------------------|---------------------|----------------------------------|-------------------------|--------------------------------------------------|-----------------------------------------------------------------------------------------------------------------------------|---------------------|----------------------|-------------------------------------------------------------------------------------------------------------------------------------------------------------------------------------------------------------------------------------------------------------------------------------|
|                     |                     |                                  |                         |                                                  |                                                                                                                             | Min                 | Max                  |                                                                                                                                                                                                                                                                                     |
| $r_{alai}$          | RaIncrease WithLAI  | $s\ m^{-1}$                      | 3.5                     | Aerodynamic resistance: contribution of LAI      | The contribution of LAI to the total aerodynamic resistance from measurement height (reference level) to the soil surface.  | 100                 | 800                  | Results from a pre-study calibration with the site data                                                                                                                                                                                                                             |
| $z_{OM,snow}$       | RoughLMo mSnow      | m                                | 2.7, 2.8                | Aerodynamic resistance: roughness length of snow | Roughness length for momentum above snow.                                                                                   | $1 \cdot 10^5$      | 0.001                | Results from a pre-study calibration with the site data                                                                                                                                                                                                                             |
| $s_k$               | SThermalCondCoef    | $W\ m^5\ ^\circ C^{-1}\ kg^{-2}$ | 4.1                     | Soil temperature: thermal conductivity of snow   | Thermal conductivity coefficient for snow.                                                                                  | $1.2 \cdot 10^{-6}$ | $2.86 \cdot 10^{-6}$ | Results from a pre-study calibration with the site data                                                                                                                                                                                                                             |
| $h_2$               | OrganicC2           | -                                | 6.3                     | Soil temperature – thermal conductivity          | Empirical constant in the heat conductivity of the organic material at the surface                                          | 0.0045              | 0.0075               | 0.005 (default value)                                                                                                                                                                                                                                                               |
| $T_{amean}$         | TempAirMean         | $^\circ C$                       | 6.5                     | Soil temperature – lower boundary                | Assumed value of mean air temperature for the lower boundary condition for heat conduction.                                 | 5.5                 | 8                    | Based on results from a pre-study calibration with the site data. Should be 1.5-5 $^\circ C$ higher than annual mean temperature (Metzger et al. 2015) which was 2.3 $^\circ C$ at Degerö during the simulation period                                                              |
| $a_{pgrain}$        | AlbedoGrainStage(1) | %                                | 2.1                     | Radiation interception: plant albedo             | Plant albedo during grain stage                                                                                             | 20                  | 31                   | Dry grass and straw up to 29 and 33, respectively (Kondratiev et al., 1964)                                                                                                                                                                                                         |
| $a_{pve,vasc}$      | AlbedoVegStage(1)   | %                                | 2.1                     | Radiation interception: vascular plant albedo    | Plant albedo of vascular plants during vegetative stage                                                                     | 10                  | 25                   | 12-22 for <i>Carex</i> ; 12.5 for bog, raised edge; 17.8 for bog, depression (Petzold and Rencz, 1975)                                                                                                                                                                              |
| $a_{pve,moss}$      | AlbedoVegStage(2)   | %                                | 2.1                     | Radiation interception: moss albedo              | Plant albedo of vascular plants during vegetative stage                                                                     | 10                  | 30                   | 11-16% in a <i>Sphagnum</i> -sedge bog (Berglund and Mace, 1972), 16.4 for <i>Sphagnum</i> , 17.5 for <i>Carex</i> , 17.9 for <i>Pragmites</i> (Zhao et al., 1997)                                                                                                                  |
| $\epsilon_{L,vasc}$ | RadEfficiency(1)    | $gDw\ MJ^{-1}$                   | 1.1                     | Plant assimilation efficiency                    | Radiation use efficiency of vascular plants for photosynthesis under optimum temperature, moisture and nutrients conditions | 1.05                | 1.31                 | Based on results from a pre-study calibration with the site data. Ranges were selected in that way, that mosses and vascular plants can contribute approximately similar to photosynthesis during summer (Vermeij, 2013). Actual values differ due to the different plant coverage. |
| $\epsilon_{L,moss}$ | RadEfficiency(2)    | $gDw\ MJ^{-1}$                   | 1.1                     | Plant assimilation efficiency                    | Radiation use efficiency of mosses for photosynthesis under optimum temperature, moisture and nutrients conditions          | 0.1                 | 0.2                  | Based on results from a pre-study calibration with the site data. Ranges were selected in that way, that mosses and vascular plants can contribute approximately similar to photosynthesis during summer (Vermeij, 2013). Actual values differ due to the different plant coverage. |
| $p_{mm,vasc}$       | T LMin(1)           | $^\circ C$                       | 1.2                     | Plant assimilation:                              | Minimum mean air temperature for                                                                                            | -6                  | 5                    | -6 reported for some alpine plants (Körner,                                                                                                                                                                                                                                         |

| Symbol              | Parameter Name         | Unit              | Equation (cf. Table S2) | Module                                                                         | Definition                                                                                                                                | Definition           |        | Literature or default value                                                                                                                                                                                                                                                                                                                                |
|---------------------|------------------------|-------------------|-------------------------|--------------------------------------------------------------------------------|-------------------------------------------------------------------------------------------------------------------------------------------|----------------------|--------|------------------------------------------------------------------------------------------------------------------------------------------------------------------------------------------------------------------------------------------------------------------------------------------------------------------------------------------------------------|
|                     |                        |                   |                         |                                                                                |                                                                                                                                           | Min                  | Max    |                                                                                                                                                                                                                                                                                                                                                            |
| $p_{mn, moss}$      | T LMin(2)              | °C                | 1.2                     | temperature response Plant assimilation: temperature response                  | photosynthesis for vascular plants<br>Minimum mean air temperature for photosynthesis for mosses                                          | -6                   | 5      | 1999),<br>5 (default value)<br>-6 reported for some alpine plants (Körner, 1999),<br>5 (default value)                                                                                                                                                                                                                                                     |
| $p_{o1, vasc}$      | T LOpt1(1)             | °C                | 1.2                     | Plant assimilation: temperature response                                       | Lower limit mean air temperature for optimum photosynthesis for vascular plants                                                           | 8                    | 14     | Need to be higher than T LMin, but lower T LOpt2                                                                                                                                                                                                                                                                                                           |
| $p_{o2, vasc}$      | T LOpt2(1)             | °C                | 1.2                     | Plant assimilation: temperature response                                       | Upper limit mean air temperature for optimum photosynthesis for vascular plants                                                           | 20                   | 32     | 23-32° C for different <i>Poacea</i> -species (Wohlfahrt et al., 1999); 12-22 °C for <i>Carex</i> and <i>Eriophorum</i> (Kummerow and Ellis, 1984)                                                                                                                                                                                                         |
| $p_{o1, moss}$      | T LOpt1(2)             | °C                | 1.2                     | Plant assimilation: temperature response                                       | Lower limit mean air temperature for optimum photosynthesis for mosses                                                                    | 5                    | 14     | Need to be higher than T LMin, but lower T LOpt2                                                                                                                                                                                                                                                                                                           |
| $p_{o2, moss}$      | T LOpt2(2)             | °C                | 1.2                     | Plant assimilation: temperature response                                       | Upper limit mean air temperature for optimum photosynthesis for mosses                                                                    | 18                   | 32     | <i>Sphagnum</i> : 18 °C (Clymo and Hayward, 1982); depending on water content, at least 27 °C (Grace, 1973)                                                                                                                                                                                                                                                |
| $f_{SnowReduceLAI}$ | SnowReduceLAIThreshold |                   |                         | Plant LAI reduction due to snow cover                                          | Minimum fraction of canopy above snow surface to allow transpiration or interception evaporation                                          | 1·10 <sup>-3</sup>   | 0.01   | Results from a pre-study calibration with the site data                                                                                                                                                                                                                                                                                                    |
| $l_{Le1}$           | LeafRate1(1)           | day <sup>-1</sup> | 1.10, 1.12              | Plant litter fall: leaf litter fall rate during the season                     | Rate coefficient for the leaf litter fall before the first threshold temperature sum $t_{L1}$ is reached                                  | 2.5·10 <sup>-4</sup> | 0.01   | Results from a pre-study calibration with the site data                                                                                                                                                                                                                                                                                                    |
| $l_{LS}$            | C Leaf to Stem(1)      | -                 | 1.8,                    | Plant litter fall: rate for leaf yellowing at the end of the vegetation period | Scaling factor for reallocation of C from the photosynthetically active to the passive pool after the plant reached maturity growth state | 0.02                 | 0.03   | Results from a pre-study calibration with the site data                                                                                                                                                                                                                                                                                                    |
| $l_{Re1, moss}$     | RootRate1(2)           |                   | 1.12                    | Plant litter fall                                                              |                                                                                                                                           | 2.5·10 <sup>-4</sup> | 0.0025 | Results from a pre-study calibration with the site data                                                                                                                                                                                                                                                                                                    |
| $l_{Re2, moss}$     | RootRate2(2)           |                   | 1.12                    | Plant litter fall                                                              |                                                                                                                                           | 2.5·10 <sup>-4</sup> | 0.0025 | Calibrated relative to $l_{Re1}$                                                                                                                                                                                                                                                                                                                           |
| $T_{Mature Sum}$    | Mature Tsum(1)         | °C                |                         | Plant phenology: start of senescence                                           | Temperature sum beginning from grain filling stage for plant reaching maturity stage                                                      | 320                  | 330    | Metzger et al., 2015 found best values leading to grain filling start around mid to end of July, which corresponds to 320-330 at this site                                                                                                                                                                                                                 |
| $k_{gresp, moss}$   | GrowthCoef(2)          |                   | 1.6                     | Plant respiration                                                              |                                                                                                                                           | 0.2                  | 0.6    | A wider range was selected for mosses compared to vascular plants, as due to the selected conceptual model, moss respiration was only growth depending, while there is an additional LAI depending component for vascular plants. Fraction of assimilates, lost by respiration according to Rice et al. 2008 for different <i>Sphagnum</i> species: 33-62% |

| Symbol              | Parameter Name      | Unit              | Equation (cf. Table S2) | Module                                                                                         | Definition                                                                                                                                              | Min                | Max                | Literature or default value                                                                                                            |
|---------------------|---------------------|-------------------|-------------------------|------------------------------------------------------------------------------------------------|---------------------------------------------------------------------------------------------------------------------------------------------------------|--------------------|--------------------|----------------------------------------------------------------------------------------------------------------------------------------|
| $k_{gresp, vasc}$   | GrowthCoef(1)       | day <sup>-1</sup> | 1.6                     | Plant respiration                                                                              | Rate coefficient for growth respiration of the plant (respiration relative to amount of assimilates)                                                    | 0.14               | 0.4                | Results from a pre-study calibration with the site data                                                                                |
| $t_{Q10}$           | RespTemQ10          | -                 | 1.7                     | Plant respiration: temperature response                                                        | response to a 10 °C soil temperature change on plant maintenance respiration                                                                            | 1.8                | 3                  | Dark respiration in <i>Eriophorum</i> : 1.1-3.7 (van de Weg et al., 2013)                                                              |
| $p_{zroot, vasc}$   | Root LowestDepth(1) | m                 | 1.13                    | Plant rooting depth – important for water uptake and root litter input within the soil profile | Maximum root depth in the function for calculating the actual root depth                                                                                | -0.5               | -0.14              | Estimated maximum rooting depth for this site is 30-45cm (Peichl, 2015, personal communication).                                       |
| $p_{zroot, moss}$   | Root LowestDepth(2) |                   | 1.13                    | Plant rooting depth – important for water uptake and root litter input within the soil profile | Maximum root depth in the function for calculating the actual root depth                                                                                | -0.1               | -0.01              | Estimation                                                                                                                             |
| $m_{retain}$        | Mobile AlloCoef(1)  | -                 | 1.14                    | Plant storage pool for regrowth in spring                                                      | Coefficient for determining ratio of leaf carbon, allocated to the mobile storage pool during leaf litter fall                                          | 0.2                | 0.6                | 0.01-0.4 was found in Metzger et al., 2015 for several peatland sites, however pre-study results suggested higher values for this site |
| $k_{l1}$            | RateCoefLitter1     | a <sup>-1</sup>   | 5.1                     | SOC decomposition                                                                              | Rate coefficient for the decay of SOC in the plant litter pools for mosses                                                                              | 2·10 <sup>-4</sup> | 0.02               | 1·10 <sup>-5</sup> to 0.03 by calibration (Metzger et al., 2015)                                                                       |
| $k_h$               | RateCoefHumus       | day <sup>-1</sup> | 3.8                     | SOC decomposition                                                                              | rate coefficient for the decay of C in the slow SOC pools                                                                                               | 1·10 <sup>-9</sup> | 2·10 <sup>-5</sup> | 1·10 <sup>-5</sup> (default value)                                                                                                     |
| $t_{min}$           | TempMin             | °C                | 5.3                     | SOC decomposition – temperature response                                                       | The temperature in the Ratkowsky function at which microbial activity is 0% .                                                                           | -10                | 0                  | -8 (default value)                                                                                                                     |
| $t_{max}$           | TempMax             | °C                | 5.3                     | SOC decomposition – temperature response                                                       | The temperature in the Ratkowsky function at which the response on microbial activity is 100%.                                                          | 20                 | 30                 | 20 (default value)                                                                                                                     |
| $p_{\theta Satact}$ | SaturationActivity  | vol %             | 5.4                     | SOC decomposition – water response                                                             | Parameter in the soil moisture response function defining the microbial activity under saturated conditions                                             | 1·10 <sup>-6</sup> | 0.01               | A very low value was chosen to get a strong response to droughts.                                                                      |
| $p_{\theta Low}$    | ThetaLowerRange     | vol %             | 5.4                     | SOC decomposition – water response                                                             | Water content interval in the soil moisture response function for microbial activity, mineralisation–immobilisation, nitrification and denitrification. | 3                  | 20                 | 13 (default value)                                                                                                                     |
| $p_{\theta Upp}$    | ThetaUpperRange     | vol %             | 5.4                     | SOC decomposition – water response                                                             | Water content interval in the soil moisture response function for microbial activity                                                                    | 6                  | 10                 | 8 (default value)                                                                                                                      |
| $k_{l2}$            | RateCoefLitter2     | a <sup>-1</sup>   | 5.1                     | SOC decomposition                                                                              | Rate coefficient for the decay of SOC in the plant litter pools for vascular plants                                                                     | 2·10 <sup>-5</sup> | 0.002              | Calibrated relative to $k_{l1}$                                                                                                        |

1

2

5

# 1 Table S2. List of main equations used in this study

| Equation                                                                                                                                                                                                                                                                                                                                                                                                                                                                                                                                                                                              | No.    | Definition                                                                                       |
|-------------------------------------------------------------------------------------------------------------------------------------------------------------------------------------------------------------------------------------------------------------------------------------------------------------------------------------------------------------------------------------------------------------------------------------------------------------------------------------------------------------------------------------------------------------------------------------------------------|--------|--------------------------------------------------------------------------------------------------|
| <b>Plant biotic processes</b>                                                                                                                                                                                                                                                                                                                                                                                                                                                                                                                                                                         |        |                                                                                                  |
| $C_{Atm \rightarrow a} = \varepsilon_L \cdot \eta \cdot f(T_l) \cdot f(E_{ta} / E_{tp}) \cdot R_{s,pl}$                                                                                                                                                                                                                                                                                                                                                                                                                                                                                               | (1.1)  | Rate of photosynthesis (g C m <sup>-2</sup> day <sup>-1</sup> )                                  |
| <p>where <math>\varepsilon_L</math> is the radiation use efficiency and <math>\eta</math> is the conversion factor from biomass to carbon. <math>R_{s,pl}</math> is the global radiation absorbed by canopy and <math>f(T_l)</math> ,and <math>f(E_{ta} / E_{tp})</math> limitations due to unfavourable temperature, nitrogen, and water conditions.</p>                                                                                                                                                                                                                                             |        |                                                                                                  |
| $f(T_l) = \begin{cases} 0 & T_l < p_{mn} \\ (T_l - p_{mn}) / (p_{o1} - p_{mn}) & p_{mn} \leq T_l \leq p_{o1} \\ 1 & p_{o1} < T_l < p_{o2} \\ 1 - (T_l - p_{o2}) / (p_{mx} - p_{o2}) & p_{o2} \leq T_l \leq p_{mx} \\ 0 & T_l > p_{mx} \end{cases}$                                                                                                                                                                                                                                                                                                                                                    | (1.2)  | Temperature response function for photosynthesis                                                 |
| <p>where <math>p_{mn}</math>, <math>p_{o1}</math>, <math>p_{o2}</math> and <math>p_{mx}</math> are parameters and <math>T_l</math> the leaf temperature.</p>                                                                                                                                                                                                                                                                                                                                                                                                                                          |        |                                                                                                  |
| $f(E_{ta} / E_{tp}) = \frac{E_{ta}}{E_{tp}}$                                                                                                                                                                                                                                                                                                                                                                                                                                                                                                                                                          | (1.3)  | Response function for transpiration                                                              |
| <p>where <math>E_{ta}</math> (Eq. 29) and <math>E_{tp}</math> (Eq. 23) are actual and potential transpiration.</p>                                                                                                                                                                                                                                                                                                                                                                                                                                                                                    |        |                                                                                                  |
| $C_{a \rightarrow Leaf} = l_{cl} \cdot C_a$                                                                                                                                                                                                                                                                                                                                                                                                                                                                                                                                                           | (1.4)  | Allocation of new assimilates to the leaves                                                      |
| <p>where <math>l_{cl}</math> is a parameter and <math>C_a</math> the new assimilated carbon.</p>                                                                                                                                                                                                                                                                                                                                                                                                                                                                                                      |        |                                                                                                  |
| $C_{a \rightarrow Root} = (1 - l_{cl}) \cdot C_a$                                                                                                                                                                                                                                                                                                                                                                                                                                                                                                                                                     | (1.5)  | Allocation of new assimilates to the roots, respectively to below ground parts in case of mosses |
| <p>where <math>l_{cl}</math> is a parameter and <math>C_a</math> the new assimilated carbon.</p>                                                                                                                                                                                                                                                                                                                                                                                                                                                                                                      |        |                                                                                                  |
| $C_{respleaf} = k_{mrespleaf} \cdot f(T) \cdot C_{leaf} + k_{gresp} \cdot C_{a \rightarrow Leaf}$                                                                                                                                                                                                                                                                                                                                                                                                                                                                                                     | (1.6)  | Plant growth and maintenance respiration (g C m <sup>-2</sup> day <sup>-1</sup> )                |
| <p>where <math>k_{mrespleaf}</math> is the maintenance respiration coefficient for leaves, <math>k_{gresp}</math> is the growth respiration coefficient, and <math>f(T_a)</math> is the temperature. The equation calculates respiration from stem, roots, and grains by exchanging <math>k_{mrespleaf}</math> to <math>k_{mrespstem}</math>, <math>k_{mresproot}</math>, <math>k_{mrespgrain}</math>, and using the corresponding storage pools. Respiration from the old carbon pools is estimated with the same maintenance respiration coefficients as for respiration from new carbon pools.</p> |        |                                                                                                  |
| $f(T) = t_{Q10}^{(T - t_{Q10bas})/10}$                                                                                                                                                                                                                                                                                                                                                                                                                                                                                                                                                                | (1.7)  | Temperature response function for maintenance respiration (–)                                    |
| <p>where <math>t_{Q10}</math> and <math>t_{Q10bas}</math> are parameters.</p>                                                                                                                                                                                                                                                                                                                                                                                                                                                                                                                         |        |                                                                                                  |
| $C_{Leaf \rightarrow Stem} = l_{LS} \cdot C_{Leaf}$                                                                                                                                                                                                                                                                                                                                                                                                                                                                                                                                                   | (1.8)  | Reallocation of C from leaf pool to stem pool – here used as pool for senescent leaves.          |
| <p>where <math>l_{LS}</math> is a parameter and <math>C_{Leaf}</math> the carbon in the leaf pool.</p>                                                                                                                                                                                                                                                                                                                                                                                                                                                                                                |        |                                                                                                  |
| $C_{Leaf \rightarrow LitterSurface} = f(T_{Sum}) \cdot f(A_l) \cdot s_{newleaf} \cdot C_{Leaf}$                                                                                                                                                                                                                                                                                                                                                                                                                                                                                                       | (1.9)  | Leaf C entering the surface litter pool is depending on the temperature sum and leaf area index. |
| <p>where <math>s_{newleaf}</math> is a scaling factor. Stem C is calculated analogously with <math>s_{newstem}</math>.</p>                                                                                                                                                                                                                                                                                                                                                                                                                                                                            |        |                                                                                                  |
| $f(l_{Lc}) = l_{Lc1} + (l_{Lc2} - l_{Lc1}) \cdot \min\left(1, \frac{\max(0, T_{Sum} - t_{L1})}{\max(1, t_{L2} - t_{L1})}\right)$                                                                                                                                                                                                                                                                                                                                                                                                                                                                      | (1.10) | Leaf litter fall dependence of temperature sum                                                   |

where  $t_{L1}$ ,  $t_{L2}$ ,  $l_{Lc1}$  and  $l_{Lc2}$  are parameters and  $T_{Sum}$  is the so called “dorming” temperature sum,  $T_{DormSum}$  is calculated at the end to the growing season when the air temperature is below the threshold temperature  $T_{DormTh}$ , as the accumulated difference between  $T_{DormTh}$  and  $T_a$ .  $T_{DormTh}$  is a parameter.

The stem litter rate is calculated analogously with the parameters  $t_{S1}$ ,  $t_{S2}$ ,  $l_{Sc1}$  and  $l_{Sc2}$ , the root litter rate with the parameters  $l_{Lc2}$  to  $t_{R1}$ ,  $t_{R2}$ ,  $l_{Rc1}$  and  $l_{Rc2}$ .

$$f(A_l) = e^{l_{LaiEnh} \cdot A_l} \quad (1.11) \quad \text{Litter fall dependency of LAI}$$

where  $l_{LaiEnh}$  is a parameter and  $A_l$  the leaf area index

$$C_{Root \rightarrow Litter} = f(l_{Rc}) \cdot C_{Root} \cdot s_{newroot} \quad (1.12) \quad \text{Root C entering the soil litter pool of the corresponding layer}$$

where  $s_{newroot}$  is a scaling factor. The root litter rate function,  $f(l_{Rc})$ , can be calculated with Eq. (10) by exchanging the parameters  $t_{L1}$ ,  $t_{L2}$ ,  $l_{Lc1}$  and  $l_{Lc2}$  to  $t_{R1}$ ,  $t_{R2}$ ,  $l_{Rc1}$  and  $l_{Rc2}$ .

$$z_r = p_{zroot} \left( \frac{B_r}{B_r + \frac{p_{zroot}}{p_{incroot}}} \right) \quad (1.13) \quad \text{Root depth}$$

where  $p_{zroot}$  and  $p_{incroot}$  are parameters and  $B_r$  is the mass of roots (i.e. the carbon content in the roots,  $C_{Roots} + C_{OldRoots}$ ).

$$C_{Mobile} = (C_{Leaf \rightarrow LitterSurface} + C_{OldLeaf \rightarrow LitterSurface}) \cdot m_{retain} \quad (1.14) \quad \text{Allocation to the mobile C pool for developing new leaves during litter fall}$$

where  $m_{retain}$  is an allocation coefficient.

$$C_{RemainLeaf} = C_{OldLeaf} \left( 1 - \frac{1}{l_{life} - 1} \right) \quad (1.15) \quad \text{Fraction of the whole } C_{OldLeaf} \text{ pool that will be excluded from the calculation of the litterfall from the old leaves}$$

where  $l_{life}$  is a parameter

$$C_{Mobile \rightarrow Leaf} = C_{Mobile} \cdot m_{shoot} \quad (1.16) \quad \text{Allocation from the mobile C pool at leafing (between GSI 1 and 2) as an additional supply. This process goes on as long as there is carbon left in the mobile pool.}$$

where  $m_{shoot}$  is an allocation coefficient and  $C_{Mobile}$  the carbon in the mobile pool.

## Plant abiotic processes

$$R_{s,pl} = (1 - e^{-k_m \frac{A_l}{f_{cc}}}) \cdot f_{cc} (1 - a_{pl}) R_{is} \quad (2.1) \quad \text{Plant interception of global radiation (MJ m}^{-2} \text{ day}^{-1}\text{)}$$

where  $k_m$  is the light use extinction coefficient given as a single parameter common for all plants,  $f_{cc}$  is the surface canopy cover,  $a_{pl}$  is the plant albedo and  $R_{is}$  is the global qion.

The plant albedo is calculated from the parameters: albedo vegetative stage,  $apveg$ , and/or albedo grain stage,  $apgrain$ , depending on plant development.

$$f_{cc} = p_{cmax} (1 - e^{-p_{ck} A_l}) \quad (2.2) \quad \text{Surface canopy cover (m}^2 \text{ m}^{-2}\text{)}$$

Where  $p_{cmax}$  is a parameter that determines the maximum surface cover and  $p_{ck}$  is a parameter that governs the speed at which the maximum surface cover is reached.  $A_l$  is the leaf area index of the plant.

$$A_l = \frac{B_l}{p_{l,sp}} \quad (2.3) \quad \text{Leaf area index (m}^2 \text{ m}^{-2}\text{) as function of leaf mass}$$

Where  $p_{l,sp}$  is a parameter and  $B_l$  is the total mass of leaf.

$$L_v E_{tp} = \frac{\Delta R_n + \rho_a c_p \frac{(e_s - e_a)}{r_a}}{\Delta + \gamma \left(1 + \frac{r_s}{r_a}\right)} \quad (2.5) \quad \text{Potential transpiration } E_{tp} \text{ (mm day}^{-1}\text{)}$$

where  $R_n$  is net radiation available for transpiration,  $e_s$  is the vapour pressure at saturation,  $e_a$  is the actual vapour pressure,  $\rho_a$  is air density,  $c_p$  is the specific heat of air at constant pressure,  $L_v$  is the latent heat of vaporisation,  $\Delta$  is the slope of saturated vapour pressure versus temperature curve,  $\gamma$  is the psychrometer 'constant',  $r_s$  is 'effective' surface resistance and  $r_a$  is the aerodynamic resistance.

$$r_a^* = \frac{\ln^2 \left( \frac{z_{ref} - d}{z_0} \right)}{k^2 u} + \Delta z_{snow} \quad (2.6) \quad \text{The aerodynamic resistance } r_a \text{ as calculated without stability correction}$$

where the wind speed,  $u$ , is given at the reference height,  $z_{ref}$ ,  $k$  is von Karman's constant,  $d$  is the displacement height and  $z_0$  is the roughness length.

$$z_0 = z_{0max} \quad z_0 > z_{0max} \quad (2.7) \quad \text{The roughness length, } z_0, \text{ is calculated according to the function derived from Shaw and Pereira (1982)}$$

$$z_0 = (H_p - \Delta z_{snow} \min(f_1, f_2)) + \Delta z_{snow} \quad z_{0min} > z_0 > z_{0max}$$

$$z_0 = z_{0min} \quad z_0 < z_{0min}$$

where  $z_{0max}$  and  $z_{0min}$  are parameters,  $f_1$  and  $f_2$  are functions describing the dependency on leaf area index and canopy density,  $\Delta z_{snow}$  is the snow depth and  $H_p$  is the canopy height.

$$d = \min \left( \left( \frac{z_{ref} - 0.5}{\left( \frac{(0.80 + 0.11 p_{densm}) - \left( (0.46 - 0.09 p_{densm}) e^{-(0.16 + 0.28 p_{densm})^{PAI}} \right)}{H_p - \Delta z_{snow}} \right)} \right) + \Delta z_s \right) \quad (2.8) \quad \text{Displacement height } d, \text{ as calculated by the Shaw and Pereira function}$$

$p_{densm}$  is density maximum of canopy in relation to the canopy height,  $\Delta z_{snow}$  is the snow depth.  $PAI$  is the plant area index,  $H_p$  is the canopy height.

$$r_s = \frac{1}{\max(A_l g_l, 0.001)} \quad (2.9) \quad \text{Stomatal resistance (s m}^{-1}\text{)}$$

where  $g_l$  is the leaf conductance and  $A_l$  the leaf area index.

$$g_l = \frac{R_{is}}{R_{is} + g_{ris}} \frac{g_{max}}{1 + \frac{(e_s - e_a)}{g_{vpd}}} \quad (2.10) \quad \text{Stomatal conductance per leaf area (m s}^{-1}\text{)}$$

where  $g_{ris}$ ,  $g_{max}$  and  $g_{vpd}$  are parameter values,  $g_{maxwin}$  corresponds to  $g_{vpd}$  in winter.  $R_{is}$  is the global radiation and  $(e_s - e_a)$  the vapour pressure deficit.

$$E_{ta} = E_{tp}^* \int_{z_r}^0 f(\psi(z))(T(z))r(z) \quad (2.11) \quad \text{Actual transpiration without flexibility of water transportation within the root system.}$$



$z_r$  is root depth (Eq. 16),  $f(\psi(z))$  and  $f(T(z))$  are response functions for soil water potential, and soil temperature and  $r(z)$  is the relative root density distribution which is exponentially decreasing from soil surface to the root depth.

$$f(\psi(z)) = \left( \frac{\psi_c}{\psi(z)} \right)^{p_1 E_p + p_2} \quad (2.12) \quad \text{Transpiration response to water stress}$$

where  $p_1$ ,  $p_2$  and  $\psi_c$  are parameters. If the soil water potential is reaching the wilting point,  $\psi_{wilt}$ , the uptake is assigned to be zero from that horizon.

$$f(T(z)) = 1 - e^{-t_{WA} \max(0, T(z) - T_{trig})^{WB}} \quad (2.13) \quad \text{Transpiration response to temperature as proposed by Axelsson and Ågren (1976)}$$

where  $t_{WA}$  and  $t_{WB}$  and the triggering temperature  $T_{trig}$  are parameters.

### Surface Energy balance

$$R_{ns} = L_v E_s + H_s + q_n \quad (3.1) \quad \text{The physically based approach, for calculating soil evaporation, originates from the idea of solving an energy balance equation for the soil surface. According to the law of conservation of energy the net radiation at the soil surface, } R_{ns}, \text{ is assumed to be equal to the sum of latent heat flux, } L_v E_s, \text{ sensible heat flux, } H_s \text{ and heat flux to the soil, } q_n. \text{ The three different heat fluxes are estimated by an iterative procedure where the soil surface temperature, } T_s, \text{ is varied according to a given scheme until the equation is balanced}$$

$$H_s = \rho_a c_p \frac{(T_s - T_a)}{r_{as}} \quad (3.2) \quad \text{sensible heat flux, } H_s$$

where air density,  $\rho_a$  and the specific heat of air at constant pressure,  $c_p$  are considered as physical constants,  $r_{as}$  is the aerodynamic resistance calculated as a function of wind and temperature gradients

$$r_{as} = r_{aa} + r_{ab} \quad (3.3) \quad \text{Aerodynamic resistance above the soil surface, } r_{as}, \text{ is calculated as a sum of two components}$$

where  $r_{aa}$  is a function of wind speed and temperature gradients, which is corrected for atmospheric stability, and  $r_{ab}$  is an additional resistance representing the influence of the crop cover,

$$r_{aa} = \frac{1}{k^2 u} \left\{ \ln \left( \frac{z_{ref} - d}{z_{0M}} \right) - \psi_M \left( \frac{z_{ref} - d}{L_O} \right) + \psi_M \left( \frac{z_{0M}}{L_0} \right) \right\} \times \left\{ \ln \left( \frac{z_{ref} - d}{z_{0H}} \right) - \psi_H \left( \frac{z_{ref} - d}{L_O} \right) + \psi_H \left( \frac{z_{0H}}{L_0} \right) \right\} \quad (3.4) \quad \text{Stability function for aerodynamic resistance at neutral conditions}$$

where  $u$  is the wind speed at the reference height,  $z_{ref}$ ,  $d$  is the zero level displacement height (c.f. potential transpiration of plant),  $k$  is the von Karmans constant and  $z_{0M}$  and  $z_{0H}$  are the surface roughness lengths for momentum and heat respectively. If  $z_{0M}$  is exchanged to  $z_{0M, snow}$  the equation can be used for snow surfaces.  $L_O$  is the Obukhov length and  $\psi_M$  and  $\psi_H$  are empirical stability functions for momentum and heat respectively.

Furthermore, an upper limit of the aerodynamic resistance in extreme stable conditions is set by the “windless exchange” coefficient,  $r_{a,soil,max}^{-1}$

$$r_{ab} = r_{alai} A_l \quad (3.5) \quad \text{Additional aerodynamic resistance representing the influence of the crop cover}$$

where  $r_{alai}$  is an empirical parameter

$$L_v E_s = \frac{\rho_a c_p (e_{surf} - e_a)}{\gamma \cdot r_{as}} \quad (3.6) \quad \text{Sum of latent heat flux, } L_v E_s$$

Where  $e_{surf}$  is the vapour pressure at the soil surface and  $e_a$  is the actual vapour pressure in the air.

$$e_{surf} = e_s(T_s) e^{\left(\frac{-\psi_l M_{water} g \cdot e_{corr}}{R(T_s + T_{abszero})}\right)} \quad (3.7) \quad \text{Vapour pressure at the soil surface}$$

where  $R$  is the gas constant,  $M_{water}$  is the molar mass of water,  $g$  is the gravity constant and  $e_s$  is the vapour pressure at saturation.

The empirical correction factor,  $e_{corr}$ , depends on an empirical parameter  $\psi_{eg}$  and a calculated mass balance at the soil surface,  $\delta_{surf}$ , which is allowed to vary between the parameters  $s_{def}$  and  $s_{excess}$  given in mm of water.

$$q_h = k_h \frac{(T_s - T_1)}{\frac{\Delta z_1}{2}} + L q_{v,s} \quad (3.8) \quad \text{Heat flux to the soil, } q_h.$$

where  $k_h$  is the thermal conductivity of the top soil layer,  $L_v$ , as well as the psychrometer constant,  $\gamma$ , are considered as physical constants;  $q_{v,s}$  is the vapor flow from the soil surface to the central point of the uppermost compartment

$$q_{v,s} = -d_{vapd} f_a D_0(T) \frac{c_{vl} - c_{vs}}{\frac{\Delta z}{2}} \quad (3.9) \quad \text{Vapor flow from the soil surface to the central point of the uppermost compartment}$$

where  $d_{vapb}$  is the tortuosity given as an empirical parameter,  $D_0$  is the diffusion coefficient for a given temperature,  $f_a$  is the fraction of air filled pores ( $\theta_s - \theta_s$ ) and  $c_{vs}$  and  $c_{vl}$  are the concentrations of water vapour at the soil surface and at the middle of the uppermost compartment respectively.

## Snow

$$k_{snow} = s_k \rho_{snow}^2 \quad (4.1) \quad \text{Thermal conductivity of snow}$$

where  $s_k$  is an empirical parameter.

$$\rho_{snow} = \frac{\rho_{prec} \Delta z_{prec} + \rho_{old} \Delta z_{old}}{\Delta z_{snow}} \quad (4.2) \quad \text{Density of snow is a weighted average of the old snow pack (i.e. the density of snow remaining from the previous day } \rho_{old}) \text{ and precipitation density, } \rho_{prec}$$

$$\rho_{prec} = \rho_{smin} + 181 \frac{(1 - Q_p)}{f_{liqmax}} \quad (4.3) \quad \text{Density of new-fallen snow as a function of air temperature, } T_a$$

where  $\rho_{smin}$  is the density of new snow,  $Q_p$  is the thermal quality of precipitation and  $f_{liqmax}$  is a parameter that defines the maximum liquid water content of falling snow that is automatically put to 0.5.

$$Q_p = \begin{cases} \min\left(1, (1 - f_{liqmax}) + f_{liqmax} \frac{T_a - T_{RainL}}{T_{SnowL} - T_{RainL}}\right) & T_a \leq T_{RainL} \\ 0 & T_a > T_{RainL} \end{cases} \quad (4.4) \quad \text{Thermal quality of precipitation (its fractional frozen water content)}$$

where  $f_{liqmax}$  is a parameter that defines the maximum liquid water content of falling snow and is automatically put to 0.5.  $T_{RainL}$  and  $T_{SnowL}$  are the temperature range where precipitation is regarded as a mixture of ice and liquid water.

$$\rho_{old} = \rho_{smin} + s_{dl} \frac{S_{wl}}{S_{wlmax}} + s_{dw} S_{res} \quad (4.5) \quad \text{Density of the old snow pack increases with the relative amount of free water in the pack and with overburden pressure, i.e., with increasing water equivalent. Density also generally increases with age. The age dependency is accounted for by updating density as the maximum density of the previous time step}$$

where  $s_{dl}$  and  $s_{dw}$  are parameters,  $S_{wlmax}$  is the retention capacity and  $S_{res}$  is the water equivalent of the snow.

$$\Delta z_{old} = \frac{S_{res}}{\rho_{old}} \quad (4.6) \quad \text{Depth of old snow pack}$$

$$f_{bare} = \begin{cases} \frac{\Delta z_{snow}}{\Delta z_{cov}} & \Delta z_{snow} < \Delta z_{cov} \\ 0 & \Delta z_{snow} \geq \Delta z_{cov} \end{cases} \quad (4.7) \quad \text{The fraction of snow free ground is used to estimate the average soil surface temperature, and the average surface albedo, during conditions of "patchy" snow cover.}$$

where  $\Delta z_{cov}$  is a threshold parameter.

$$M = M_T T_a + M_R R_{is} + \frac{f_{qh} q_h(0)}{L_f} \quad (4.8) \quad \text{The fundamental part of the empirically based snow model is the melting-freezing function, which combines the mass and heat budgets. The amount of snow melt, } M, \text{ is made up by a temperature function, } M_T, \text{ a function accounting for influence of solar radiation, } M_R, \text{ and the soil surface heat flow, } q_h(0):$$

where  $T_a$  is air temperature,  $R_{is}$  is global radiation,  $f_{qh}$  is a scaling coefficient and  $L_f$  is the latent heat of freezing. Melting will affect the whole snow pack, whereas refreezing will only affect a limited surface layer.

$$M_T = \begin{cases} m_T & T_a \geq 0 \\ \frac{m_T}{\Delta z_{snow} m_f} & T_a < 0 \end{cases} \quad (4.9) \quad \text{Refreezing efficiency is, inversely proportional to snow depth, } \square_{snow}:$$

where  $T_a$  is air temperature and  $m_T$  and  $m_f$  are parameters.

$$M_R = m_{Rmin} (1 + s_1 (1 - e^{-s_2 s_{age}})) \quad (4.10) \quad \text{Global radiation dependence of snow melt}$$

where  $m_{Rmin}$ ,  $s_1$  and  $s_2$  are parameters.

Age of surface snow,  $s_{age}$ , is determined by the number of days since the last snowfall. To reduce the influence of mixed precipitation and minor showers, snowfall is counted in this context only for snow spells larger than a critical value,  $p_{samin}$ , and for precipitation with thermal quality,  $Q_p$ , above a threshold value

---

#### Soil carbon and nitrogen processes

---

$$C_{DecompL} = k_l \cdot f(T) \cdot f(\theta) \cdot C_{Litter} \quad (5.1) \quad \text{Decomposition of the SOC pools for plant litter (g C m}^{-2} \text{ day}^{-1}\text{)}$$


---

Where  $k_i$  is a parameter and  $f(T)$  and  $f(\theta)$  are response functions for soil temperature and moisture in the certain layer.

$$C_{DecompH} = k_h \cdot f(T) \cdot f(\theta) \cdot C_{Humus} \quad (5.2) \quad \text{Decomposition of the SOC pools for more stable material (g C m}^{-2} \text{ day}^{-1})$$

Where  $k_h$  is a parameter and  $f(T)$  and  $f(\theta)$  are response functions for soil temperature and moisture in the certain layer.

$$f(T) = 1 \quad T > t_{max} \quad (5.3) \quad \text{Response function for soil temperature according Ratkowsky.}$$

$$f(T) = \left( \frac{T - t_{min}}{t_{max} - t_{min}} \right)^2 \quad t_{min} < T < t_{max} \quad (-)$$

$$f(T) = 0 \quad T < t_{min}$$

Where  $t_{min}$  and  $t_{max}$  are parameters and  $T$  the soil temperature in the certain layer.

$$f(\theta) = \min \left( \begin{array}{l} \left( \frac{\theta_s - \theta}{p_{\theta Upp}} \right)^{p_{\theta p}} (1 - p_{\theta Satact}) + p_{\theta Satact}, \\ \left( \frac{\theta - \theta_{wilt}}{p_{\theta Low}} \right)^{p_{\theta p}} \end{array} \right) \quad \theta_{wilt} \leq \theta \leq \theta_s \quad (5.4) \quad \text{Response function for soil moisture (-)}$$

$$0 \quad \theta < \theta_{wilt}$$

where  $p_{\theta Upp}$ ,  $p_{\theta Low}$ ,  $p_{\theta Satact}$ , and  $p_{\theta p}$  are parameters and the variables,  $\theta_s$ ,  $\theta_{wilt}$ , and  $\theta$ , are the soil moisture content at saturation, the soil moisture content at the wilting point, and the actual soil moisture content, respectively.

$$C_{LitterSurface \rightarrow Litter1} = l_{l1} \cdot C_{LitterSurface} \quad (5.5) \quad \text{Litter from inactive surface litter pool, entering the fast SOC pool at a continuous rate.}$$

where  $l_{l1}$  is a parameter and  $C_{LitterSurface}$  the carbon in the surface litter pool.

$$C_{Litter \rightarrow CO_2} = (1 - f_{e,l}) \cdot C_{DecompL} \quad (5.6) \quad \text{Amount of decomposition products from the fast SOC pools being released as CO}_2$$

where  $f_{e,l}$  is a parameter

$$C_{Litter \rightarrow Humus} = f_{e,l} \cdot f_{h,l} \cdot C_{DecompL} \quad (5.7) \quad \text{Amount of decomposition products from the fast SOC pools entering the slow decomposition pools}$$

where  $f_{e,l}$  and  $f_{h,l}$  are parameters

$$C_{Litter \rightarrow Litter} = f_{e,l} (1 - f_{h,l}) \cdot C_{DecompL} \quad (5.8) \quad \text{Amount of decomposition products from the fast SOC pools being returned to the fast decomposition pools}$$

where  $f_{e,l}$  and  $f_{h,l}$  are parameters

$$C_{Humus \rightarrow CO_2} = f_{e,h} \cdot C_{DecompL} \quad (5.9) \quad \text{Amount of decomposition products from the slow SOC pools being released as CO}_2$$

where  $f_{e,h}$  is a parameter

Soil heat processes

$$q_h = -k_h \frac{\partial T}{\partial z} \quad (6.1) \quad \text{Soil heat flux (J m}^{-2} \text{ day}^{-1})$$

where  $k_h$  is the conductivity,  $T$  is the soil temperature and  $z$  is depth.

$$q_h(0) = k_{ho} \frac{(T_s - T_1)}{\Delta z / 2} + C_w(T_s) q_{in} + L_v q_{vo} \quad (6.2) \quad \text{Upper boundary condition for soil heat flow (J m}^{-2} \text{ day}^{-1})$$

where  $k_{ho}$  is the conductivity of the organic material at the surface,  $T_s$  is the surface temperature,  $T_1$  is the temperature in the uppermost soil layer,  $q_{in}$  is the water infiltration rate,  $q_{vo}$  is the water vapour flow, and  $L_v$  is the latent heat.

$$k_{ho} = h_1 + h_2\theta \quad (6.3) \quad \text{Heat conductivity of the organic material at the surface}$$

where  $h_1$  and  $h_2$  are empirical constants

$$T_{ss} = \frac{T_1 + aT_a}{1 + a} \quad (6.4) \quad \text{Soil surface temperature under the snow pack, during periods with snow cover (°C)}$$

where the index 1 means the top soil layer, and the snow surface temperature is assumed to be equal to air temperature.  $a$  is a weighting factor depending on snow thickness and conductivity in the snow pack and in the uppermost soil layer.

$$T_{LowB} = T_{amean} - T_{aamp} e^{-\frac{z}{d_a}} \cos\left(\left(t - t_{ph}\right)\omega - \frac{z}{d_a}\right) \quad (6.5) \quad \text{Temperature at the lower boundary for heat conduction (°C)}$$

where  $T_{amean}$  and  $T_{aamp}$  are parameters,  $t$  is the time,  $t_{ph}$  is the phase shift,  $\omega$  is the frequency of the cycle and  $d_a$  is the damping depth.

### Soil water processes

$$q_w = -k_w \left( \frac{\partial \psi}{\partial z} - 1 \right) - D_v \frac{\partial c_v}{\partial z} \quad (6.6) \quad \text{The total water flow, } q_w, \text{ is the sum of the matrix flow, } q_{mat} \text{ and the vapour flow, } q_v, \text{ (mm day}^{-1}\text{)}$$

where  $k_w$  is the unsaturated hydraulic conductivity,  $\psi$  is the water tension,  $z$  is depth,  $c_v$  is the concentration of vapour in soil air and  $D_v$  is the diffusion coefficient for vapour in the soil

$$\frac{\partial \theta}{\partial t} = -\frac{\partial q_w}{\partial z} + s_w \quad (6.7) \quad \text{The general equation for unsaturated water flow follows from the law of mass conservation and eq. (30)}$$

where  $\theta$  is the soil water content and  $s_w$  is a source/sink term for e.g. horizontal in and outflow or root water uptake.

$$S_e = \left( \frac{\psi}{\psi_a} \right)^{-\lambda} \quad (6.8) \quad \text{Water tension } \psi \text{ according to Brooks and Corey (1965), between the threshold values } \psi_x \text{ and } \psi_{mat}.$$

where  $\psi_a$  is the air-entry tension,  $\lambda$  is the pore size distribution index and  $S_e$  the effective saturation.

$$S_e = \frac{\theta - \theta_r}{\theta_s - \theta_r} \quad (6.9) \quad \text{Effective saturation } S_e, \text{ between the threshold values } \psi_x \text{ and } \psi_{mat}.$$

where  $\theta_s$  is the porosity,  $\theta_r$  is porosity content and  $\theta$  is the actual water content.

$$k_w^* = k_{mat} \left( \frac{\psi_a}{\psi} \right)^{2+(2+n)\lambda} \quad (6.10) \quad \text{Unsaturated hydraulic conductivity } k_w^* \text{ (mm day}^{-1}\text{) according Brooks and Corey.}$$

Where the matrix conductivity  $k_{mat}$  is a function of the total conductivity,  $n$  is a parameter accounting for pore correlation and flow path tortuosity and  $\lambda$  is the pore size distribution index.

$$k_{mat} = 10^{(\log k_{sat} - \log h_{com})h_{sens} + \log k_{sat}} \quad (6.11) \quad \text{Matrix conductivity as function of total conductivity}$$

where  $h_{com}$  and  $h_{sens}$  are parameters and  $k_{sat}$  is the total saturated conductivity.

$$q_{wp} = \int_{z_p}^{z_{sat}} k_s \frac{(z_{sat} - z_p)}{d_u d_p} dz$$

where  $d_u$  is the unit length of the horizontal element i.e. 1 m,  $z_p$  is the lower depth of the drainage pipe i.e. the drainage level,  $z_{sat}$  is the simulated depth of the ground water table and  $d_p$  is a characteristic distance between drainage pipes. Note that this is a simplification where the actual flow paths and the actual gradients are not represented. Only flows above the drain level  $z_p$  are considered

(6.12) The horizontal flow rate,  $q_{wp}$ , is assumed to be proportional to the hydraulic gradient and to the thickness and saturated hydraulic conductivity of each soil layer

$$k_w^* = 10^{\left( \log(k_w^*(\theta_s - \theta_m)) + \frac{\theta + \theta_s + \theta_m}{\theta_m} \log\left(\frac{k_{sat}}{k_w(\theta_s - \theta_m)}\right) \right)}$$

where  $k_{sat}$  is the saturated total conductivity, which includes the macro pores, and  $k_w^*(\theta_s - \theta_m)$  is the hydraulic conductivity below  $\theta_s - \theta_m$  (i.e. at  $\psi_{mat}$ ) calculated from Eq. (51)

(6.13) Total conductivity close to saturation (above the threshold  $\psi_x$ ), to account for the conductivity in the macro pores.

$$k_w = (r_{AOT} + r_{AIT} T_s) \max(k_w^*, k_{minuc})$$

where  $r_{AOT}$ ,  $r_{AIT}$  and  $k_{minuc}$  are parameter values.  $k_w^*$  is the conductivity according to eqs (51) and (52)

(6.14) Actual unsaturated hydraulic conductivity after temperature corrections

1

2

1 Table S3. Fixed parameters used in the main equations.

| Symbol                | Parameter Name    | Unit                        | Eq.         | Module                                                            | Definition                                                                                                                                                                                               | Value      | Literature or default value                                       |
|-----------------------|-------------------|-----------------------------|-------------|-------------------------------------------------------------------|----------------------------------------------------------------------------------------------------------------------------------------------------------------------------------------------------------|------------|-------------------------------------------------------------------|
| $\eta$                | Biomass to carbon | mol C<br>g <sup>-1</sup> dw | 1.1         | Plant biomass:C ratio                                             | Conversion factor from biomass to carbon                                                                                                                                                                 | 0.45       | Default value                                                     |
| $p_{mx}$              | PhoTempResMax     | °C                          | 1.2         | Plant assimilation: temperature response                          | Maximum mean air temperature for photosynthesis                                                                                                                                                          | 45         | Based on results from a pre-study calibration with the site data. |
| $l_{cl}$              | Leaf c1(1)        | g C <sup>-1</sup>           | 1.4,<br>1.5 | Plant allocation of assimilates to the leaves                     | Fraction of new assimilates which is allocated to the leaves                                                                                                                                             | 0.545      | Metzger et al., 2015                                              |
| $k_{mresleaf, vasc}$  | MCoefLeaf(1)      | day <sup>-1</sup>           | 1.6         | Plant respiration                                                 | Rate coefficient for maintenance respiration of vascular plant leaves (respiration relative to leaf biomass)                                                                                             | 0.002<br>5 | Based on results from a pre-study calibration with the site data. |
| $k_{mresproot, vasc}$ | MCoefRoot(1)      | day <sup>-1</sup>           | 1.6         | Plant respiration                                                 | Maintenance respiration coefficient for vascular plant root (respiration relative to root biomass)                                                                                                       | 0.002<br>5 | Metzger et al., 2015                                              |
| $k_{mresstem, moss}$  | MCoefStem(1)      | day <sup>-1</sup>           | 1.6         | Plant respiration                                                 | Maintenance respiration coefficient for vascular plant stem = photosynthetically inactive biomass like e.g. senescent leaves that are still attached to the plant (respiration relative to stem biomass) | 0          | No respiration, as this represents brown, senescent biomass       |
| $k_{mresleaf, moss}$  | MCoefLeaf(2)      | day <sup>-1</sup>           | 1.6         | Plant respiration                                                 | Rate coefficient for maintenance respiration of moss leaves (respiration relative to leaf biomass)                                                                                                       | 0          | No leaf respiration for mosses to allow a fixed moss capita       |
| $k_{mresproot, moss}$ | MCoefRoot(2)      | day <sup>-1</sup>           | 1.6         | Plant respiration                                                 | Maintenance respiration coefficient for moss "root" = leaves and stem below the capita (respiration relative to root biomass)                                                                            | 0.002<br>5 | Based on results from a pre-study calibration with the site data. |
| $t_{Q10bas}$          | TemQ10Bas         | °C                          | 1.7         | Plant respiration: Temperature response                           | Base temperature for the temperature response of plant respiration, at which the response is 1                                                                                                           | 20         | Default value                                                     |
| $s_{newstem}$         | New Stem(1)       | -                           |             | Plant litter fall                                                 | Scaling factor for litter fall from new stems                                                                                                                                                            | 1          | Full litterfall rate applies, no scaling                          |
| $l_{sc1}$             | StemRate1(1)      | day <sup>-1</sup>           | 1.10        | Plant litter fall                                                 | Rate coefficient for the litter fall from stems before the first threshold temperature sum $t_{s1}$ is reached                                                                                           | 0.05       | Based on results from a pre-study calibration with the site data. |
| $l_{sc2}$             | StemRate2(1)      | day <sup>-1</sup>           | 1.10        | Plant litter fall                                                 | Rate coefficient for the litter fall from stems after the second threshold temperature sum $t_{s2}$ is reached                                                                                           | 0.5        | Based on results from a pre-study calibration with the site data. |
| $s_{newleaf}$         | New Leaf          | -                           |             | Plant litter fall                                                 | Scaling factor for litter fall from new leaves                                                                                                                                                           | 1          | Full litterfall rate applies, no scaling                          |
| $l_{lc2}$             | LeafRate2(1)      | day <sup>-1</sup>           | 1.10        | Plant litter fall: leaf litter fall rate at the end of the season | Rate coefficient for the leaf litter fall after the second threshold temperature sum $t_{l2}$ is reached                                                                                                 | 0.5        | Based on results from a pre-study calibration with the site data. |
| $t_{l1}$              | LeafTsum1(1)      | day°C                       | 1.10        | Plant litter fall                                                 | Threshold temperature sum after reaching dormancy state for the lower leaf litter rate. When it is reached, $l_{lc1}$ starts to change towards the increased litter fall rate $l_{lc2}$                  | 2          | Based on results from a pre-study calibration with the site data. |
| $t_{l2}$              | LeafTsum2(1)      | day°C                       | 1.10        | Plant litter fall                                                 | Threshold temperature sum after reaching dormancy state for the higher leaf litter rate. When it is reached, the full high litter rate is applied.                                                       | 14         | Based on results from a pre-study calibration with the site data. |
| $t_{s1}$              | StemTsum1(1)      | day°C                       | 1.10        | Plant litter fall                                                 | Threshold temperature sum after reaching dormancy state for the lower stem litter rate. When it is reached, $t_{sc1}$ starts to change                                                                   | 2          | Based on results from a pre-study calibration with the site data. |

| Symbol           | Parameter Name    | Unit              | Eq.               | Module                                                                                                | Definition                                                                                                                                                                    | Value       | Literature or default value                                       |
|------------------|-------------------|-------------------|-------------------|-------------------------------------------------------------------------------------------------------|-------------------------------------------------------------------------------------------------------------------------------------------------------------------------------|-------------|-------------------------------------------------------------------|
|                  |                   |                   |                   |                                                                                                       | towards the increased litter fall rate                                                                                                                                        |             |                                                                   |
| $t_{L2}$         | StemTsum2(1)      | day°C             | 1.10              | Plant litter fall                                                                                     | $t_{Sc2}$<br>Threshold temperature sum after reaching dormancy state for the higher stem litter rate. When it is reached, the full high litter rate is applied.               | 14          | Based on results from a pre-study calibration with the site data. |
| $T_{DormTh}$     | Dormancy Tth      | °C                | 1.10              | Plant litter fall                                                                                     | Threshold temperature for plant dormancy – if the temperature falls below this value for five consecutive days, the dormancy temperature sum starts to be calculated.         | 0.7         | Based on results from a pre-study calibration with the site data. |
| $l_{LaiEnh}$     | LAI Enh Coef(1)   | -                 | 1.11              | Plant litter fall                                                                                     | Scaling factor for enhanced leaf litter fall rates when higher LAI values are reached                                                                                         | 0.56        | Metzger et al., 2015                                              |
| $t_{R1}$         | RootTsum1(1)      | day°C             | 1.10<br>,<br>1.12 | Plant litter fall                                                                                     | Threshold temperature sum after reaching dormancy state for the lower root litter rate. When it is reached, $t_{Re1}$ starts to change towards the increased litter fall rate | 2           | Based on results from a pre-study calibration with the site data. |
| $t_{R2}$         | RootTsum2(1)      | day°C             | 1.10<br>,<br>1.12 | Plant litter fall                                                                                     | $t_{Re2}$<br>Threshold temperature sum after reaching dormancy state for the higher root litter rate. When it is reached, the full high litter rate is applied.               | 14          | Based on results from a pre-study calibration with the site data. |
| $S_{newroots}$   | New Roots         | -                 |                   | Plant litter fall                                                                                     | Scaling factor for litter fall from new roots                                                                                                                                 | 1           | Full litterfall rate applies, no scaling                          |
| $l_{Re1, vasc}$  | RootRate1(1)      | day <sup>-1</sup> | 1.12              | Plant litter fall                                                                                     | Rate coefficient for the litter fall from roots before the first threshold temperature sum $t_{R1}$ is reached                                                                | 0.001<br>25 | Based on results from a pre-study calibration with the site data. |
| $l_{Re2, vasc}$  | RootRate2(1)      | day <sup>-1</sup> | 1.12              | Plant litter fall                                                                                     | Rate coefficient for the litter fall from roots after the second threshold temperature sum $t_{R2}$ is reached                                                                | 0.005       | Based on results from a pre-study calibration with the site data. |
| $l_{Re1, moss}$  | RootRate1(2)      | day <sup>-1</sup> | 1.12              | Plant litter fall                                                                                     | Rate coefficient for the litter fall from moss "roots" (=belowground leaves & stems) before the first threshold temperature sum $t_{R1}$ is reached                           | 0.000<br>5  | Based on results from a pre-study calibration with the site data. |
| $l_{Re2, moss}$  | RootRate2(2)      | day <sup>-1</sup> | 1.12              | Plant litter fall                                                                                     | Rate coefficient for the litter fall from moss "roots" after the second threshold temperature sum $t_{R2}$ is reached                                                         | 0.000<br>5  | Based on results from a pre-study calibration with the site data. |
| $l_{lffe, vasc}$ | Max Leaf Lifetime | a                 | 1.15              | Plant litter fall                                                                                     | Maximum leaf lifetime vascular plant                                                                                                                                          | 1           | Vascular plant leaves were assumed to be renewed after one year   |
| $l_{lffe, moss}$ | Max Leaf Lifetime | a                 | 1.15              | Plant litter fall                                                                                     | Maximum leaf lifetime mosses                                                                                                                                                  | 300         | Moss capita was assumed to be constant and therefore never dies   |
|                  | I C Leaf(1)       | g m <sup>-2</sup> |                   |                                                                                                       | Initial N content of vascular plant leaves; defines C and therefore biomass by defined C:N ratio                                                                              | 32.5        | Based on results from a pre-study calibration with the site data. |
|                  | I C Leaf(2)       | g m <sup>-2</sup> |                   |                                                                                                       | Initial N content of moss leaves; defines C and therefore biomass by defined C:N ratio                                                                                        | 95          | Based on results from a pre-study calibration with the site data. |
|                  | I C Roots(1)      | g m <sup>-2</sup> |                   |                                                                                                       | Initial N content of vascular plant roots defines C and therefore biomass by defined C:N ratio                                                                                | 100         | Based on results from a pre-study calibration with the site data. |
|                  | I C Roots(2)      | g m <sup>-2</sup> |                   |                                                                                                       | Initial N content of belowground moss parts ("roots") defines C and therefore biomass by defined C:N ratio                                                                    | 95          | Based on results from a pre-study calibration with the site data. |
| $p_{incroot}$    | Root IncDepth     | -                 | 1.13              | Plants: shape of root distribution – important for water uptake and root litter input within the soil | Distribution parameter in the function for calculating the actual root depth                                                                                                  | -1          | Default value                                                     |



| Symbol            | Parameter Name          | Unit                         | Eq.  | Module                                                                     | Definition                                                                                                                                                                                                                                          | Value          | Literature or default value                                               |
|-------------------|-------------------------|------------------------------|------|----------------------------------------------------------------------------|-----------------------------------------------------------------------------------------------------------------------------------------------------------------------------------------------------------------------------------------------------|----------------|---------------------------------------------------------------------------|
|                   |                         |                              |      | profile                                                                    |                                                                                                                                                                                                                                                     |                |                                                                           |
| $m_{shoot}$       | Shoot Coef              | -                            | 1.16 | Plant storage pool for regrowth in spring                                  | Coefficient for the rate at which C is reallocated from the mobile pool to the leaf at leafing                                                                                                                                                      | 0.07           | Based on results from a pre-study calibration with the site data.         |
| $k_m$             | RntLAI                  | -                            | 2.1  | Plant radiation interception: partitioning between plants and soil         | Extinction coefficient in the Beer's law used to calculate the partitioning of net radiation between canopy and soil surface                                                                                                                        | 0.8            | Based on results from a pre-study calibration with the site data.         |
| $p_{cmax, vasc}$  | Maximal Cover(1)        | $\frac{m^2}{m^{-2}}$         | 2.2  | Radiation interception: Plant coverage                                     | Maximum surface cover of vascular plants                                                                                                                                                                                                            | 0.6            | Visually estimated plant coverage at the site                             |
| $p_{cmax, moss}$  | Maximal Cover(2)        | $\frac{m^2}{m^{-2}}$         | 2.2  | Radiation interception: Plant coverage                                     | Maximum surface cover of mosses                                                                                                                                                                                                                     | 1              | Visually estimated plant coverage at the site                             |
| $p_{ck}$          | Area kExp(1)            | -                            | 2.2  | Radiation interception: Plant coverage                                     | Speed at which the maximum surface cover of the plant canopy is reached                                                                                                                                                                             | 1              | Based on results from a pre-study calibration with the site data.         |
| $p_{l,sp}$        | Specific LeafArea       | $\frac{g}{m^{-2}}$           | 2.3  | Plant LAI:phytomass ratio                                                  | Factor for calculating LAI from leaf biomass, which is actually the inverse of specific leaf area, i.e. leaf mass per unit leaf                                                                                                                     | 47.5           | Metzger et al., 2015                                                      |
| $T_{EmergTh}$     | TempSumCrit             | $^{\circ}C$                  |      | Plant phenology: start of growing season                                   | Critical air temperature that must be exceeded for temperature sum calculation                                                                                                                                                                      | 5              | Default value                                                             |
| $T_{EmergSu}$     | TempSumStart            | $^{\circ}C$                  |      | Plant phenology: start of growing season                                   | Air temperature sum which is the threshold for start of plant development                                                                                                                                                                           | 50             | Default value                                                             |
| $p_{densm, vasc}$ | Canopy DensMax(1)       | -                            | 2.8  | Plant: density of vascular plant canopy                                    | The density maximum of canopy in relation to the canopy height                                                                                                                                                                                      | 0.7            | Default value                                                             |
| $p_{densm, moss}$ | Canopy DensMax(2)       | -                            | 2.8  | Plant: density of moss canopy                                              | The density maximum of canopy in relation to the canopy height                                                                                                                                                                                      | 0.9            | Estimation for the site                                                   |
| $g_{ris}$         | CondRis                 | $\frac{J}{m^{-2} day^{-1}}$  | 2.10 | Plant assimilation: radiation saturation                                   | Global radiation intensity that represents half-light saturation in the light response                                                                                                                                                              | $5 \cdot 10^6$ | Default value                                                             |
| $C_{H0, canopy}$  | WindLessExchange Canopy | $m s^{-1}$                   | 2.6  | Aerodynamic resistance of canopy: minimum exchange under stable conditions | Roughness length used in the calculation of $r_a$ for each plant, corresponds to $z_0$ in eq. 2.6.                                                                                                                                                  | 0.001          | Default value                                                             |
| $z_{ref}$         | ReferenceHeight         | m                            | 2.6  | Aerodynamic resistance of canopy: minimum exchange under stable conditions | Height above ground which represent the level for measured air temperature, air humidity and wind speed.                                                                                                                                            | 2              | Default value                                                             |
| $z_{0max}$        | Roughness Max           | m                            | 2.7  | Aerodynamic resistance: roughness length of plants                         | The maximum roughness length used when estimating roughness length of different canopies (see "Aerodynamic resistance").                                                                                                                            | 3              | Default value                                                             |
| $z_{0min}$        | Roughness Min           | m                            | 2.7  | Aerodynamic resistance: roughness length of plants                         | The minimum roughness length used when estimating roughness length of different canopies                                                                                                                                                            | 0.01           | Default value                                                             |
| $g_{vpd}$         | CondVPD                 | Pa                           | 2.10 | Transpiration stress due to low air humidity                               | Vapour pressure deficit that corresponds to a 51 % reduction of stomata conductance                                                                                                                                                                 | 100            | Default value                                                             |
| $p_2$             | NonDemandRelCoef        | $\frac{kg}{m^{-2} day^{-1}}$ | 27   | Transpiration stress due to too low water content                          | Coefficient in moisture reduction function. The degree of reduction when the actual pressure head exceeds the critical threshold, $\psi_c$ , is controlled by this coefficient together with $p_1$ and the potential transpiration rate, $E_{tp}$ . | 0.1            | Default value                                                             |
| $p_{ox}$          | AirRedCoef              | -                            | 28   | Transpiration and assimilation stress due to high                          | A rate coefficient that governs how rapidly the plant resistance will increase because of the lack of                                                                                                                                               | 0              | The plants are assumed to be well adapted to wet conditions and therefore |

| Symbol                | Parameter Name        | Unit                 | Eq.            | Module                                                                        | Definition                                                                                                                                                                                                         | Value   | Literature or default value                                                                                                                                                                                                         |
|-----------------------|-----------------------|----------------------|----------------|-------------------------------------------------------------------------------|--------------------------------------------------------------------------------------------------------------------------------------------------------------------------------------------------------------------|---------|-------------------------------------------------------------------------------------------------------------------------------------------------------------------------------------------------------------------------------------|
| $\theta_{Amin}$       | AirMinContent         | vol %                | 29             | Transpiration and assimilation stress due to high water content               | oxygen when the water content of the soil exceeds the value give by the actual soil moisture content, $\theta$<br>The minimum amount of air that is necessary to prevent any reduced uptake of water from the soil | 0       | do not suffer from water stress due to too wet conditions<br>The plants are assumed to be well adapted to wet conditions and therefore do not suffer from water stress due to too wet conditions                                    |
| $t_{WB}$              | TempCoefB             | -                    | 2.13           | Transpiration stress due to limited water availability under low temperatures | Temperature coefficient in the temperature response function.                                                                                                                                                      | 0.4     | Default value                                                                                                                                                                                                                       |
| $t_{WC}$              | TempCoefC             | -                    |                | Transpiration stress due to limited water availability under low temperatures | Temperature coefficient governing the triggering temperature.                                                                                                                                                      | 0       | Default value                                                                                                                                                                                                                       |
| $r_{a,soil,max}^{-1}$ | WindLessExchange Soil | -                    | 3.4            | Aerodynamic resistance: upper limit under windless conditions                 | Minimum turbulent exchange coefficient (inverse of maximum allowed aerodynamic resistance) over bare soil. Avoids exaggerated surface cooling in windless conditions or extreme stable stratification.             | 0.001   | Default value                                                                                                                                                                                                                       |
| $z_{OM}$              | RoughLBareSoilM om    | m                    | 3.4            | Aerodynamic resistance: roughness length of bare soil                         | Surface roughness length for momentum above bare soil.                                                                                                                                                             | 0.001   | Default value                                                                                                                                                                                                                       |
| $s_{excess}$          | MaxSurfExcess         | mm                   | 3.7            | Vapour pressure at the soil surface                                           | The highest value allowed for the $\delta_{surf}$ variable, which is used in the calculations of soil surface resistance and vapour pressure at the soil surface.                                                  | 1       | Default value                                                                                                                                                                                                                       |
| $s_{def}$             | MaxSurfDeficit        | mm                   | 3.7            | Vapour pressure at the soil surface                                           | The lowest value allowed for the $\delta_{surf}$ variable, which is used in the calculations of soil surface resistance and vapour pressure at the soil surface.                                                   | -2      | Default value                                                                                                                                                                                                                       |
| $d_{vapb}$            | DVapTortuosity        | -                    | 3.9            |                                                                               | Correction factor because of non-perfect condition for diffusion                                                                                                                                                   | 0.66    | Default value                                                                                                                                                                                                                       |
| $k_{mat}$             | Matrix Conductivity   | mm day <sup>-1</sup> | 6.10           | Soil hydraulic conductivity: temperature dependence                           | Saturated matrix conductivity                                                                                                                                                                                      | 100     | Default value                                                                                                                                                                                                                       |
| $\theta_s$            | Saturation            | vol %                | 5.4, 6.9       | Soil hydraulic properties: shape of water retention                           | Water content at saturation                                                                                                                                                                                        | 98 (95) | Received by comparing resulting pF curves with curves measured in peatlands (Kellner and Lundin, 2001) under consideration of the range for the calibrated parameter AirEntry; the value in brackets is used for layers below -30cm |
| $\theta_{wilt}$       | Wilting Point         | vol %                | 5.4            | Soil hydraulic properties: shape of water retention                           | Water content at wilting point                                                                                                                                                                                     | 30 (30) | Received by comparing resulting pF curves with curves measured in peatlands (Kellner and Lundin 2001) under consideration of the range for the calibrated parameter AirEntry; the value in brackets is used for layers below -30cm  |
| $\psi_x$              | Upper Boundary        | cm                   | 6.8, 6.9, 6.13 | Soil hydraulic properties: shape of water retention                           | Soil water tension at the upper boundary of Brooks and Corey's expression                                                                                                                                          | 8000    | Default value                                                                                                                                                                                                                       |

| Symbol      | Parameter Name     | Unit                 | Eq.        | Module                                              | Definition                                                                                                      | Value      | Literature or default value                                                                                                                                                                                                        |
|-------------|--------------------|----------------------|------------|-----------------------------------------------------|-----------------------------------------------------------------------------------------------------------------|------------|------------------------------------------------------------------------------------------------------------------------------------------------------------------------------------------------------------------------------------|
| $\lambda$   | Lambda             | -                    | 6.8, 6.10  | Soil hydraulic properties: shape of water retention | Pore size distribution index                                                                                    | 0.3 (0.2)  | Received by comparing resulting pF curves with curves measured in peatlands (Kellner and Lundin 2001) under consideration of the range for the calibrated parameter AirEntry; the value in brackets is used for layers below -30cm |
| $z$         | LowerDepth         | m                    |            | Soil hydraulic properties: Border between horizons  | Depth of the border between the upper and lower horizon in respect to hydrological properties                   | 0.3        | Boundary between acrotelm and catotelm, based on visual differences in the soil profile and water table depth measurements (Granberg et al., 1999). Default value                                                                  |
| $h_1$       | OrganicC1          | -                    | 6.3        | Soil temperature - thermal conductivity             | Empirical constant in the heat conductivity of the organic material at the surface                              | 0.06       | Default value                                                                                                                                                                                                                      |
| $T_{amp}$   | TempAirAmpl        | °C                   | 6.5        | Soil temperature - lower boundary                   | Assumed value of the amplitude of the sine curve, representing the lower boundary condition for heat conduction | 10         | Default value                                                                                                                                                                                                                      |
| $Z_{humus}$ | OrganicLayerThick  | m                    |            | Soil thermal properties                             | Thickness of the humus layer as used as a thermal property                                                      | 3          | Site specific value for peat depth. Measurements at the site indicate a peat depth of 3-4m                                                                                                                                         |
| $\theta_r$  | Residual Water     | vol %                | 6.9        | Soil hydraulic properties: shape of water retention | Residual soil water content                                                                                     | 1 (1)      | Received by comparing resulting pF curves with curves measured in peatlands (Kellner and Lundin 2001) under consideration of the range for the calibrated parameter AirEntry; The value in brackets is used for layers below -30cm |
| $n$         | n Tortuosity       | -                    | 6.10       | Unsaturated soil hydraulic conductivity of soil     | Parameter for pore correlation and flow path tortuosity in the function for unsaturated hydraulic conductivity  | 1 (1)      | Based on results from a pre-study calibration with the site data. The value in brackets is used for layers below -30cm                                                                                                             |
| $z_p$       | DrainLevel         | m                    | 6.12       | Soil water: drainage depth                          | Lower depth of the drainage                                                                                     | -0.12      | Measured water level during wet periods at the site                                                                                                                                                                                |
|             | DrainLevelMin      | m                    |            | Soil water: minimum drain level                     | Lowest possible water level                                                                                     | -0.6       | Well below the lowest measured water table at that site (0.4).                                                                                                                                                                     |
| $\theta_m$  | Macro Pore         | vol %                | 6.13       | Soil hydraulic properties: shape of water retention | Macro pore volume                                                                                               | 4 (4)      | Received by comparing resulting pF curves with curves measured in peatlands (Kellner and Lundin 2001) under consideration of the range for the calibrated parameter AirEntry; the value in brackets is used for layers below -30cm |
| $k_{sat}$   | Total Conductivity | mm day <sup>-1</sup> | 6.11, 6.13 | Saturated soil hydraulic conductivity of soil       | Total conductivity under saturated conditions                                                                   | 1610 (800) | From measured dry bulk density according Päävänen, 1973                                                                                                                                                                            |
| $r_{AIT}$   | TempFacLinIncrease | °C <sup>-1</sup>     | 6.14       | Soil hydraulic conductivity: temperature dependence | The slope coefficient in a linear temperature dependence function for the hydraulic conductivity                | 0.023      | Default value                                                                                                                                                                                                                      |
| $r_{AOT}$   | TempFacAtZero      | -                    | 6.14       | Soil hydraulic conductivity: temperature dependence | Relative hydraulic conductivity at 0°C compared with a reference temperature of 20°C.                           | 0.55       | Default value                                                                                                                                                                                                                      |

| Symbol         | Parameter Name      | Unit                 | Eq.           | Module                             | Definition                                                                                                   | Value              | Literature or default value                                       |
|----------------|---------------------|----------------------|---------------|------------------------------------|--------------------------------------------------------------------------------------------------------------|--------------------|-------------------------------------------------------------------|
| $k_{minuc}$    | MinimumConductValue | mm day <sup>-1</sup> | 6.14          | Soil hydraulic conductivity        | The minimum hydraulic conductivity in the hydraulic conductivity function.                                   | 1·10 <sup>-5</sup> | Default value                                                     |
| $f_{e,l}$      | Eff Litter1&2       | day <sup>-1</sup>    | 5.6, 5.7, 5.8 | SOC decomposition                  | Fraction of decomposition products from the fast SOC pools being released as CO <sub>2</sub>                 | 0.5                | Default value                                                     |
| $f_{h,l}$      | HumFracLitter1&2    | day <sup>-1</sup>    | 5.6, 5.7, 5.8 | SOC decomposition                  | Fraction of decomposition products from the fast SOC pools that will enter the slow decomposition pools      | 0.2                | Default value                                                     |
| $p_{\theta p}$ | ThetaPowerCoef      | vol %                | 5.4           | SOC decomposition – water response | Power coefficient in the response function of microbial activity in dependency of soil moisture              | 1                  | Default value                                                     |
| $l_{ll}$       | RateCoefSurf L1&2   | day <sup>-1</sup>    | 5.5           | SOC decomposition                  | Fraction of the above ground residues that enter the pool for fast decomposition of the uppermost soil layer | 0.005              | Default value                                                     |
| $f_{e,h}$      | Eff Humus           | day <sup>-1</sup>    | 5.9           | SOC decomposition                  | Fraction of decomposition products from the slow SOC pools being released as CO <sub>2</sub>                 | 0.5                | Default value                                                     |
| $cn_m$         | CN Ratio Microbe    | -                    |               | SOC decomposition                  | Litter quality at which decomposers shift from immobilisation of mineral N to net mineralisation             | 30                 | Based on results from a pre-study calibration with the site data. |
|                | Latitude            | -                    |               |                                    | Geographic position; used for the calculation of cloudiness                                                  | 65.18              | Location of the site                                              |

1

1 Table S4. Correlation coefficients between parameters and performance. The maximum value  
 2 is shown if a parameter correlated with several performance indices or several sub periods of  
 3 the same variable. The first two digits after decimal point are displayed. Values < 0.14 are not  
 4 shown.

| Module                  | Symbol               | NEE night dynamics | NEE night ME | LAI dynamics | LAI ME | NEE day dynamics | NEE day ME | NEE dynamics | NEE ME | Rad dynamics | Rad ME | Ts <sub>1</sub> dynamics | Ts <sub>1</sub> ME | Ts <sub>2</sub> dynamics | Ts <sub>2</sub> ME | H dynamics | H ME | LE dynamics | LE ME | WT dynamics | WT ME | Snow dynamics | Snow ME |    |
|-------------------------|----------------------|--------------------|--------------|--------------|--------|------------------|------------|--------------|--------|--------------|--------|--------------------------|--------------------|--------------------------|--------------------|------------|------|-------------|-------|-------------|-------|---------------|---------|----|
| SOC decomposition       | $P_{\theta Upp}$     |                    |              |              |        |                  |            |              |        |              |        |                          |                    |                          |                    |            |      |             |       |             |       |               |         |    |
|                         | $P_{\theta Low}$     |                    |              |              |        |                  |            |              |        |              |        |                          |                    |                          |                    |            |      |             |       |             |       |               |         |    |
|                         | $P_{\theta Satact}$  |                    |              |              |        |                  |            |              |        |              |        |                          |                    |                          |                    |            |      |             |       |             |       |               |         |    |
|                         | $t_{max}$            |                    |              |              |        |                  |            |              |        |              |        |                          |                    |                          |                    |            |      |             |       |             |       |               |         |    |
|                         | $t_{min}$            | 23                 |              |              |        |                  |            |              |        | 32           |        |                          |                    |                          |                    |            |      |             |       |             |       |               |         |    |
|                         | $k_h$                |                    |              |              |        |                  |            |              |        |              |        |                          |                    |                          |                    |            |      |             |       |             |       |               |         |    |
| Plant                   | $k_{l1}$             | 33                 | 31           |              |        | 30               | 30         | 70           | 33     |              |        |                          |                    |                          |                    |            |      |             |       |             |       |               |         |    |
|                         | $m_{retain}$         |                    |              |              |        |                  |            | 30           |        |              |        |                          |                    |                          |                    |            |      | 32          | 30    | 31          |       | 21            |         |    |
|                         | $P_{root, moss}$     |                    |              |              |        |                  |            |              |        |              |        |                          |                    |                          |                    |            |      |             |       |             |       |               |         |    |
|                         | $P_{root, vasc}$     |                    |              |              |        |                  |            |              |        |              |        |                          |                    |                          |                    |            |      |             |       |             |       |               |         |    |
|                         | $t_{Q10}$            |                    |              |              |        |                  |            |              |        |              |        |                          |                    |                          |                    |            |      |             |       |             |       |               |         |    |
|                         | $k_{gresp, vasc}$    | 52                 |              | 60           |        | 55               | 28         | 30           |        |              |        |                          |                    | 28                       |                    |            | 21   |             | 31    | 45          |       |               |         |    |
|                         | $k_{gresp, moss}$    | 31                 | 30           |              |        |                  |            |              |        | 23           |        |                          |                    |                          |                    |            |      |             |       |             |       |               |         |    |
|                         | $T_{MatureSum}$      |                    |              |              |        |                  |            |              |        |              |        |                          |                    |                          |                    |            |      |             |       |             |       |               |         |    |
|                         | $l_{Rc1, moss}$      |                    |              |              |        |                  |            |              |        |              |        |                          |                    |                          |                    |            |      |             |       |             |       |               |         |    |
|                         | $l_{LS}$             |                    |              |              |        |                  |            |              |        |              |        |                          |                    |                          |                    |            |      |             |       |             |       |               |         |    |
|                         | $l_{Lc1}$            | 30                 |              | 86           | 33     | 32               | 49         | 44           | 30     |              |        |                          |                    |                          |                    |            | 32   | 29          | 50    | 28          | 68    | 13            |         |    |
|                         | $f_{snowReduceLAI}$  |                    |              |              |        |                  |            |              |        |              |        |                          |                    |                          |                    |            |      |             |       |             |       |               |         |    |
|                         | $P_{o2, moss}$       |                    |              |              |        |                  |            |              |        |              |        |                          |                    |                          |                    |            |      |             |       |             |       |               |         |    |
|                         | $P_{o2, vasc}$       |                    |              |              |        |                  |            |              |        |              |        |                          |                    |                          |                    |            |      |             |       |             |       |               |         |    |
|                         | $P_{o1, vasc}$       |                    |              |              |        |                  |            |              |        |              |        |                          |                    |                          |                    |            |      |             |       |             |       |               |         |    |
|                         | $P_{mn, moss}$       |                    |              |              |        |                  |            |              |        |              |        |                          |                    |                          |                    |            |      |             |       |             |       |               |         |    |
|                         | $P_{mn, vasc}$       |                    |              |              |        |                  |            |              | 33     |              |        |                          |                    |                          |                    |            |      |             |       |             |       |               |         |    |
|                         | $P_{o1, moss}$       |                    |              |              |        |                  |            |              |        |              |        |                          |                    |                          |                    |            |      |             |       |             |       |               |         |    |
|                         | $\epsilon_L, moss$   |                    |              |              |        |                  |            | 70           |        | 32           |        |                          |                    |                          |                    |            |      |             |       |             |       |               |         |    |
|                         | $\epsilon_L, vasc$   |                    |              | 51           |        |                  |            |              |        |              |        |                          |                    |                          |                    |            |      |             |       |             |       |               |         |    |
|                         | Rn interc epin       | $a_{pve, vasc}$    |              |              |        |                  |            |              |        |              | 77     | 76                       |                    | 52                       |                    |            | 63   | 62          |       |             |       |               |         |    |
|                         |                      | $a_{pve, vasc}$    |              |              |        |                  |            |              |        |              |        |                          |                    |                          |                    |            |      |             |       |             |       |               |         |    |
| $a_{pgrain}$            |                      |                    |              |              |        |                  |            |              |        |              |        |                          |                    |                          |                    |            |      |             |       |             |       |               |         |    |
| Soil tempe nature       | $T_{amean}$          |                    |              |              |        |                  |            |              |        |              |        |                          |                    |                          | 59                 |            |      |             |       |             |       |               |         |    |
|                         | $h_2$                |                    |              |              |        |                  |            |              |        |              |        | 31                       | 30                 | 78                       | 57                 |            |      |             |       |             |       |               |         |    |
|                         | $S_k$                |                    |              |              |        | 20               |            |              |        | 31           | 64     | 54                       | 62                 | 18                       |                    |            |      |             |       |             |       | 25            |         |    |
| Aerodyna mic resistance | $\zeta_{OM, snow}$   |                    |              |              |        |                  |            |              |        | 31           | 67     |                          |                    |                          |                    | 54         | 58   | 72          |       |             |       |               |         |    |
|                         | $r_{alai}$           | 32                 |              |              |        |                  |            |              |        |              |        | 75                       | 77                 | 83                       | 51                 |            |      | 30          | 28    | 33          | 25    |               |         |    |
|                         | $r_{a, max, snow-1}$ |                    |              |              |        |                  |            |              |        |              |        |                          |                    |                          |                    |            |      |             |       |             |       |               |         |    |
| Transpiration           | $C_{H0, canopy}$     |                    |              |              |        |                  |            |              |        | 32           |        |                          |                    |                          |                    | 56         |      | 86          |       | 20          |       |               |         |    |
|                         | $\psi_{eg}$          |                    |              |              |        |                  |            |              |        |              |        |                          |                    |                          |                    |            |      |             |       |             |       |               |         |    |
|                         | $P_l$                |                    |              |              |        |                  |            |              |        |              |        |                          |                    |                          |                    |            |      |             |       |             |       |               |         |    |
|                         | $\psi_c$             |                    |              |              |        |                  |            |              |        |              |        |                          |                    |                          |                    |            |      |             |       |             |       |               |         |    |
|                         | $t_{WA}$             |                    |              |              |        |                  |            |              |        |              |        |                          |                    |                          |                    |            |      |             |       |             |       |               |         |    |
|                         | $g_{maxwin}$         |                    |              |              |        |                  |            |              |        |              |        |                          |                    |                          |                    | 17         | 61   | 72          | 75    | 51          | 32    |               |         |    |
|                         | $g_{max, moss}$      |                    |              |              |        |                  |            | 28           |        |              |        | 13                       |                    |                          |                    | 45         | 29   | 67          | 59    | 65          | 32    |               |         |    |
| $g_{max, vasc}$         | 32                   |                    |              |              |        |                  |            |              |        |              |        |                          |                    |                          |                    |            | 49   | 27          | 44    | 27          |       |               |         |    |
| Soil hydrolog           | $d_p$                |                    |              |              |        |                  |            |              |        |              |        |                          |                    |                          |                    |            |      |             |       |             | 13    | 22            |         |    |
|                         | $\psi_a$             | 66                 | 44           |              | 47     | 52               | 45         | 56           |        | 50           |        | 67                       |                    | 65                       |                    | 64         | 62   | 66          | 77    | 76          | 65    | 30            |         |    |
| Snow                    | $h_{com}$            |                    |              |              |        |                  |            |              |        |              |        |                          |                    |                          |                    |            |      |             |       |             |       |               |         |    |
|                         | $T_{RainL}$          |                    |              |              |        |                  |            |              |        |              |        |                          |                    |                          |                    |            |      | 23          |       |             |       |               | 19      |    |
|                         | $m_T$                |                    |              |              |        |                  |            |              |        |              |        | 47                       | 17                 |                          |                    |            |      | 86          |       |             | 25    |               | 78      | 66 |
|                         | $\rho_{smin}$        |                    |              |              |        |                  |            |              |        |              |        | 30                       | 32                 | 23                       |                    |            |      |             |       |             |       |               | 47      |    |
|                         | $S_{dl}$             |                    |              |              |        |                  |            |              |        |              |        |                          |                    |                          |                    |            |      |             |       |             |       |               | 62      |    |
|                         | $S_{dw}$             |                    |              |              |        |                  |            |              |        |              |        |                          |                    |                          |                    |            |      |             |       |             |       |               | 61      | 58 |
|                         | $f_{gh}$             |                    |              |              |        |                  |            |              |        |              |        | 21                       |                    |                          |                    |            |      |             |       |             |       |               |         |    |
|                         | $m_{Rmin}$           |                    |              |              |        |                  |            |              |        |              |        |                          |                    | 21                       |                    |            |      |             |       |             |       |               |         |    |
|                         | $\Delta z_{cov}$     |                    |              |              |        |                  |            |              |        |              |        |                          |                    |                          |                    |            |      |             |       |             |       |               |         |    |

1 Table S5. Prior and posterior parameter ranges of the basic selection. Deviations of parameter  
 2 ranges from the prior, after applying the basic criteria. Only parameters with a deviation are  
 3 shown. The deviation is given in percentage of the prior range.

|                               | Max | $\psi_a$ | $k_{resp,vasc}$ | $m_{retain}$ | $\epsilon_{L,vasc}$ | $g_{max,moos}$ | $l_{LCI}$ | $l_{LS}$ |
|-------------------------------|-----|----------|-----------------|--------------|---------------------|----------------|-----------|----------|
| Min Range deviation           | 3%  | 3%       | 0%              | 0%           | 0%                  | 0%             | 0%        | 0%       |
| Max Range deviation           | 1%  | 1%       | 0%              | 0%           | 0%                  | 0%             | 0%        | 0%       |
| Mean Range deviation          | 13% | 8%       | 13%             | 8%           | 10%                 | 8%             | 9%        | 7%       |
| St.D range deviation          | 11% | 11%      | 5%              | 4%           | 2%                  | 2%             | 5%        | 1%       |
| 5 Percentile range deviation  | 11% | 11%      | 2%              | 10%          | 4%                  | 1%             | 0%        | 2%       |
| 51 Percentile range deviation | 17% | 10%      | 17%             | 10%          | 12%                 | 10%            | 9%        | 10%      |
| 95 Percentile range deviation | 19% | 19%      | 14%             | 1%           | 1%                  | 4%             | 13%       | 2%       |

4  
 5  
 6  
 7

1 Table S6. Correlation coefficients of the detected equifinalities. The first two digits after  
 2 decimal point are displayed. Values < 0.14 are not shown.

|                                  | $k_h$    | $\rho_{\text{Sactact}}$ | $t_{\text{max}}$ | $t_{\text{min}}$ | $\rho_{\text{llow}}$ | $\rho_{\text{llpp}}$ | $k_{11}$ | $\rho_{\text{zroot, vasc}}$ | $T_{\text{MatureSum}}$ | $k_{\text{gresp, vasc}}$ | $\rho_{\text{mn, vasc}}$ | $\rho_{o1, \text{vasc}}$ | $\rho_{o2, \text{vasc}}$ | $m_{\text{retain}}$ | $\epsilon_L, \text{vasc}$ | $\epsilon_L, \text{moss}$ | $\rho_{\text{mn, moss}}$ | $\rho_{o1, \text{moss}}$ | $\rho_{o2, \text{moss}}$ | $k_{\text{gresp, moss}}$ | $\rho_{\text{zroot, moss}}$ | $I_{\text{ReL, moss}}$ | $\bar{J}_{\text{SnowReduceLAI}}$ | $t_{Q10}$ | $I_{\text{LC1}}$ | $I_{\text{LS}}$ | $\sigma_{\text{pve, vasc}}$ |    |
|----------------------------------|----------|-------------------------|------------------|------------------|----------------------|----------------------|----------|-----------------------------|------------------------|--------------------------|--------------------------|--------------------------|--------------------------|---------------------|---------------------------|---------------------------|--------------------------|--------------------------|--------------------------|--------------------------|-----------------------------|------------------------|----------------------------------|-----------|------------------|-----------------|-----------------------------|----|
| $\rho_{\text{0Upp}}$             |          |                         |                  |                  |                      |                      |          |                             |                        |                          |                          |                          |                          |                     |                           |                           |                          |                          |                          |                          |                             | 16                     |                                  |           |                  |                 |                             |    |
| $\rho_{\text{0Low}}$             |          |                         |                  |                  |                      |                      |          |                             |                        |                          |                          |                          |                          |                     |                           |                           |                          | 16                       |                          |                          |                             |                        |                                  |           | 21               |                 |                             |    |
| $\rho_{\text{0Sactact}}$         |          |                         |                  |                  |                      |                      |          |                             |                        |                          |                          |                          |                          |                     |                           |                           |                          |                          |                          | 16                       |                             |                        |                                  |           |                  |                 |                             |    |
| $t_{\text{max}}$                 |          |                         |                  |                  |                      |                      |          | 18                          |                        |                          |                          |                          | 21                       |                     |                           |                           |                          |                          |                          |                          |                             |                        |                                  | 18        |                  |                 |                             | 19 |
| $t_{\text{min}}$                 |          |                         |                  |                  |                      |                      |          |                             |                        |                          |                          |                          |                          |                     |                           |                           |                          |                          |                          |                          |                             |                        |                                  |           |                  |                 |                             |    |
| $k_h$                            |          |                         |                  |                  |                      |                      |          |                             |                        |                          |                          |                          |                          |                     |                           |                           |                          |                          |                          |                          |                             |                        |                                  |           |                  |                 |                             |    |
| $k_{11}$                         |          |                         |                  |                  |                      |                      |          |                             |                        |                          |                          |                          |                          |                     |                           |                           |                          |                          |                          | 19                       |                             |                        |                                  |           |                  |                 |                             |    |
| $m_{\text{retain}}$              |          |                         |                  |                  |                      |                      |          |                             | 20                     |                          |                          |                          |                          | 19                  | 19                        |                           |                          |                          |                          |                          |                             |                        |                                  |           | 17               |                 |                             |    |
| $\rho_{\text{zroot, moss}}$      |          |                         |                  |                  |                      |                      |          |                             |                        |                          |                          |                          |                          |                     |                           |                           |                          |                          |                          |                          |                             |                        |                                  |           |                  |                 |                             |    |
| $\rho_{\text{zroot, vasc}}$      |          |                         |                  |                  |                      |                      |          |                             |                        |                          |                          |                          |                          |                     |                           |                           |                          |                          |                          |                          |                             |                        |                                  |           |                  |                 |                             |    |
| $t_{Q10}$                        |          |                         | 18               |                  |                      |                      |          |                             |                        |                          |                          |                          |                          | 17                  | 25                        | 26                        |                          |                          |                          |                          |                             | 19                     |                                  |           |                  |                 |                             |    |
| $k_{\text{gresp, vasc}}$         |          |                         |                  |                  |                      |                      |          |                             |                        |                          |                          |                          |                          | 20                  |                           |                           |                          |                          |                          |                          |                             |                        |                                  |           |                  |                 |                             |    |
| $k_{\text{gresp, moss}}$         | 16       |                         |                  |                  |                      |                      | 19       |                             |                        |                          |                          |                          |                          |                     |                           |                           |                          |                          |                          |                          |                             |                        |                                  |           |                  |                 |                             |    |
| $T_{\text{MatureSum}}$           |          |                         | 18               |                  |                      |                      |          |                             |                        |                          |                          |                          |                          |                     |                           |                           |                          |                          |                          |                          |                             |                        |                                  |           |                  |                 |                             |    |
| $I_{\text{ReL, moss}}$           |          |                         |                  |                  |                      | 16                   |          |                             |                        |                          |                          |                          |                          |                     |                           |                           |                          |                          |                          |                          |                             |                        |                                  | 19        |                  |                 |                             |    |
| $I_{\text{LS}}$                  |          |                         |                  |                  |                      |                      |          |                             |                        |                          |                          |                          |                          |                     |                           | 16                        |                          |                          |                          |                          |                             |                        |                                  |           |                  |                 |                             |    |
| $I_{\text{LC1}}$                 |          |                         |                  |                  | 21                   |                      |          |                             |                        |                          |                          |                          |                          |                     |                           |                           |                          |                          |                          |                          |                             |                        |                                  |           |                  |                 |                             |    |
| $\bar{J}_{\text{SnowReduceLAI}}$ |          |                         |                  |                  |                      |                      |          |                             |                        |                          |                          | 19                       |                          |                     |                           |                           |                          |                          |                          |                          |                             |                        |                                  |           |                  |                 |                             |    |
| $\rho_{o2, \text{moss}}$         |          |                         | 21               |                  |                      |                      |          |                             |                        |                          |                          |                          |                          |                     |                           | 19                        |                          |                          |                          |                          |                             |                        |                                  |           |                  |                 |                             |    |
| $\rho_{o2, \text{vasc}}$         |          |                         |                  |                  |                      |                      |          |                             |                        |                          |                          |                          |                          |                     |                           |                           |                          |                          |                          |                          |                             |                        |                                  |           |                  |                 |                             |    |
| $\rho_{o1, \text{vasc}}$         |          |                         |                  |                  |                      |                      |          |                             |                        |                          |                          |                          |                          |                     |                           |                           |                          |                          |                          |                          |                             |                        |                                  | 19        |                  |                 |                             |    |
| $\rho_{\text{mn, moss}}$         |          |                         |                  |                  |                      |                      |          |                             |                        |                          |                          |                          |                          |                     |                           |                           |                          |                          |                          |                          |                             |                        |                                  |           | 26               |                 |                             |    |
| $\rho_{\text{mn, vasc}}$         |          |                         |                  |                  |                      |                      |          |                             |                        |                          |                          |                          |                          |                     |                           | 24                        |                          |                          |                          |                          |                             |                        |                                  |           |                  |                 |                             |    |
| $\rho_{o1, \text{moss}}$         |          |                         |                  |                  | 16                   |                      |          |                             |                        |                          |                          |                          |                          |                     |                           |                           |                          |                          |                          |                          |                             |                        |                                  |           |                  |                 |                             |    |
| $\epsilon_L, \text{moss}$        |          |                         |                  |                  |                      |                      |          |                             |                        | 24                       |                          |                          |                          |                     |                           |                           |                          |                          | 19                       |                          |                             |                        |                                  |           |                  |                 | 16                          |    |
| $\epsilon_L, \text{vasc}$        |          |                         |                  |                  |                      |                      |          |                             | 25                     |                          |                          |                          |                          | 19                  |                           |                           |                          |                          |                          |                          |                             | 19                     |                                  |           |                  |                 |                             |    |
| $\sigma_{\text{pve, vasc}}$      |          |                         | 19               |                  |                      |                      |          |                             |                        |                          |                          |                          |                          |                     |                           |                           |                          |                          |                          |                          |                             |                        |                                  |           |                  |                 |                             |    |
| $\sigma_{\text{pve, moss}}$      |          |                         |                  |                  |                      |                      |          |                             |                        |                          |                          |                          |                          |                     |                           |                           |                          |                          |                          |                          |                             |                        |                                  |           |                  |                 |                             |    |
| $\sigma_{\text{pgrain}}$         |          |                         |                  |                  |                      |                      |          |                             |                        |                          |                          |                          |                          |                     |                           |                           |                          |                          |                          |                          |                             |                        |                                  |           |                  |                 |                             |    |
| $T_{\text{amean}}$               | 14       |                         |                  |                  |                      |                      |          |                             |                        |                          |                          |                          |                          |                     |                           |                           |                          |                          |                          |                          |                             |                        |                                  |           |                  |                 |                             |    |
| $h_2$                            |          |                         |                  |                  |                      |                      |          | 20                          |                        |                          |                          |                          |                          |                     |                           |                           |                          |                          |                          |                          |                             |                        |                                  |           |                  |                 |                             |    |
| $S_k$                            |          |                         |                  |                  |                      |                      |          |                             |                        |                          |                          |                          |                          |                     |                           |                           |                          |                          |                          |                          |                             |                        |                                  | 23        |                  |                 |                             |    |
| $Z_{\text{0M, snow}}$            |          |                         |                  |                  |                      |                      |          |                             |                        |                          |                          |                          |                          |                     |                           |                           |                          |                          |                          |                          |                             |                        |                                  |           |                  |                 |                             |    |
| $t_{\text{alai}}$                |          |                         |                  |                  |                      |                      |          |                             |                        |                          |                          |                          |                          |                     |                           |                           |                          |                          |                          |                          |                             |                        |                                  |           |                  |                 |                             |    |
| $r_{\text{a, max, snow-1}}$      |          |                         |                  |                  |                      | 16                   |          |                             |                        |                          |                          |                          |                          |                     |                           |                           |                          |                          |                          |                          |                             |                        |                                  |           |                  |                 |                             |    |
| $C_{\text{HO, canopy}}$          |          |                         |                  |                  |                      |                      |          | 16                          | 19                     |                          |                          |                          |                          |                     |                           |                           |                          |                          | 16                       |                          |                             |                        |                                  |           |                  |                 |                             |    |
| $\psi_{\text{eg}}$               |          |                         |                  |                  |                      |                      |          |                             |                        |                          |                          |                          |                          |                     |                           |                           |                          |                          |                          |                          |                             |                        |                                  |           |                  |                 |                             |    |
| $\rho_1$                         |          |                         |                  |                  |                      |                      |          |                             |                        |                          |                          | 19                       |                          |                     |                           |                           |                          |                          |                          |                          |                             |                        |                                  |           | 16               |                 |                             |    |
| $\psi_c$                         |          |                         |                  |                  |                      |                      |          |                             |                        |                          |                          |                          |                          |                     |                           |                           |                          |                          |                          |                          |                             |                        |                                  |           |                  |                 |                             |    |
| $t_{\text{WA}}$                  |          |                         |                  |                  |                      |                      |          |                             |                        |                          |                          |                          |                          |                     |                           |                           |                          |                          |                          |                          |                             |                        |                                  |           |                  |                 |                             |    |
| $g_{\text{maxwin}}$              |          |                         |                  |                  |                      |                      |          |                             |                        |                          |                          | 17                       |                          |                     |                           |                           |                          |                          |                          |                          |                             |                        |                                  |           |                  |                 | 20                          |    |
| $g_{\text{max, moss}}$           |          |                         |                  |                  |                      |                      |          |                             | 21                     |                          |                          |                          |                          |                     |                           |                           |                          |                          |                          |                          |                             |                        | 20                               |           |                  |                 |                             |    |
| $g_{\text{max, vasc}}$           |          |                         |                  |                  |                      |                      |          |                             |                        |                          |                          |                          |                          |                     |                           |                           |                          |                          |                          |                          |                             |                        |                                  |           |                  |                 |                             | 22 |
| $d_p$                            |          | 16                      |                  |                  |                      |                      |          |                             | 23                     | 18                       |                          |                          |                          |                     |                           |                           |                          |                          |                          |                          |                             |                        |                                  |           |                  |                 |                             |    |
| $\psi_a$                         |          | 17                      |                  |                  |                      |                      |          |                             |                        |                          |                          |                          |                          |                     |                           |                           |                          |                          |                          |                          |                             |                        |                                  |           |                  |                 |                             |    |
| $h_{\text{com}}$                 |          |                         |                  |                  |                      |                      |          |                             |                        |                          |                          |                          |                          |                     |                           |                           |                          |                          |                          |                          |                             |                        |                                  |           |                  |                 |                             |    |
| $T_{\text{RainL}}$               |          |                         |                  |                  |                      |                      |          |                             |                        |                          |                          |                          |                          |                     |                           |                           |                          |                          |                          |                          |                             |                        |                                  |           |                  |                 |                             |    |
| $m_T$                            |          |                         |                  |                  |                      |                      |          |                             |                        |                          |                          |                          |                          |                     |                           |                           |                          |                          |                          |                          |                             |                        |                                  |           |                  |                 | 14                          |    |
| $\rho_{\text{smin}}$             |          |                         |                  |                  | 14                   |                      |          |                             |                        |                          |                          |                          |                          |                     |                           |                           |                          |                          |                          |                          |                             |                        |                                  |           |                  |                 |                             |    |
| $S_{\text{dl}}$                  |          |                         |                  |                  |                      |                      |          |                             |                        |                          |                          |                          |                          |                     |                           |                           |                          |                          |                          |                          |                             |                        |                                  |           |                  |                 |                             |    |
| $S_{\text{dw}}$                  |          |                         |                  |                  |                      |                      | 20       |                             |                        |                          | 17                       |                          |                          |                     |                           |                           |                          |                          |                          |                          |                             |                        |                                  |           |                  |                 |                             |    |
| $f_{\text{qb}}$                  | 16       |                         |                  |                  |                      |                      |          |                             |                        |                          |                          |                          |                          |                     |                           | 28                        | 17                       |                          |                          |                          |                             |                        |                                  |           |                  |                 |                             |    |
| $m_{\text{Rmin}}$                |          |                         |                  |                  |                      |                      |          |                             |                        |                          |                          |                          |                          |                     |                           |                           |                          |                          |                          |                          |                             |                        |                                  |           |                  |                 |                             |    |
| $\Delta Z_{\text{cov}}$          |          |                         |                  |                  |                      |                      |          |                             |                        |                          |                          |                          |                          |                     |                           |                           |                          |                          |                          |                          |                             |                        |                                  |           |                  |                 |                             |    |
| <b>Count</b>                     | <b>2</b> | <b>3</b>                | <b>3</b>         | <b>1</b>         | <b>3</b>             | <b>2</b>             | <b>2</b> | <b>0</b>                    | <b>5</b>               | <b>3</b>                 | <b>3</b>                 | <b>2</b>                 | <b>1</b>                 | <b>3</b>            | <b>3</b>                  | <b>3</b>                  | <b>2</b>                 | <b>2</b>                 | <b>2</b>                 | <b>3</b>                 | <b>2</b>                    | <b>2</b>               | <b>2</b>                         | <b>5</b>  | <b>2</b>         | <b>3</b>        | <b>1</b>                    |    |

3  
4

1 Table S6 continued.

|                        | $\alpha_{pgrain}$ | $\alpha_{pvc, vasc}$ | $h_2$    | $S_k$    | $Z_{0M, snow}$ | $r_{alai}$ | $T_{amean}$ | $r_{a, max, snow-1}$ | $I$      | $G_{H0, canopy}$ | $g_{max, vasc}$ | $\psi_c$ | $\rho_l$ | $g_{max, moss}$ | $\psi_{eg}$ | $g_{maxwin}$ | $t_{WA}$ | $\psi_a$ | $d_p$    | $h_{com}$ | $m_T$    | $T_{RainL}$ | $m_{Rmin}$ | $f_{gh}$ | $\Delta Z_{cov}$ | $\rho_{min}$ | $S_{dl}$ | $S_{dw}$ |    |
|------------------------|-------------------|----------------------|----------|----------|----------------|------------|-------------|----------------------|----------|------------------|-----------------|----------|----------|-----------------|-------------|--------------|----------|----------|----------|-----------|----------|-------------|------------|----------|------------------|--------------|----------|----------|----|
| $\rho_{\theta Upp}$    |                   |                      |          |          |                |            |             | 16                   |          |                  |                 |          |          |                 |             |              |          |          |          |           |          |             |            |          |                  |              |          |          |    |
| $\rho_{\theta Low}$    |                   |                      |          |          |                |            |             |                      |          |                  |                 |          |          |                 |             |              |          |          |          |           |          |             |            |          |                  | 14           |          |          |    |
| $\rho_{\theta Satact}$ |                   |                      |          |          |                |            |             |                      |          |                  |                 |          |          |                 |             |              |          | 17       | 16       |           |          |             |            |          |                  |              |          |          |    |
| $t_{max}$              |                   |                      |          |          |                |            |             |                      |          |                  |                 |          |          |                 |             |              |          |          |          |           |          |             |            |          |                  |              |          |          |    |
| $t_{min}$              |                   |                      |          |          |                |            |             |                      |          |                  |                 |          |          |                 |             |              |          |          |          |           |          |             |            |          |                  |              |          |          |    |
| $k_h$                  |                   |                      |          |          |                |            | 14          |                      |          |                  |                 |          |          |                 |             |              |          |          |          |           |          |             | 16         |          |                  |              |          |          |    |
| $k_{l1}$               |                   |                      |          |          |                |            |             |                      |          |                  |                 |          |          |                 |             |              |          |          |          |           |          |             |            |          |                  |              |          |          | 20 |
| $m_{retain}$           |                   |                      |          |          |                |            |             |                      |          |                  |                 |          |          |                 |             |              |          |          |          |           |          |             |            |          |                  |              |          |          |    |
| $\rho_{zroot, moss}$   |                   |                      |          |          |                |            |             |                      |          |                  |                 |          |          | 20              |             |              |          |          |          |           |          |             |            |          |                  |              |          |          |    |
| $\rho_{zroot, vasc}$   |                   |                      |          |          |                |            |             |                      |          |                  |                 |          |          |                 |             |              |          |          |          |           |          |             |            |          |                  |              |          |          |    |
| $t_{Q10}$              |                   |                      |          |          |                |            |             |                      |          |                  |                 |          | 16       |                 |             |              |          |          |          |           |          |             |            |          |                  |              |          |          |    |
| $k_{gresp, vasc}$      |                   |                      |          |          |                |            |             |                      |          |                  | 19              |          |          |                 |             |              |          |          |          |           |          |             |            |          |                  |              |          |          |    |
| $k_{gresp, moss}$      |                   |                      |          |          |                |            |             |                      |          |                  | 16              |          |          |                 |             |              |          |          |          |           |          |             |            |          |                  |              |          |          |    |
| $T_{MatureSum}$        |                   |                      | 20       |          |                |            |             |                      |          | 16               |                 |          |          |                 |             |              |          |          |          | 21        |          |             |            |          |                  |              |          |          |    |
| $I_{Re1, moss}$        |                   |                      |          |          |                |            |             |                      |          |                  |                 |          |          |                 |             |              |          |          |          |           |          |             |            |          |                  |              |          |          |    |
| $I_{LS}$               |                   |                      |          |          |                |            |             |                      |          | 22               |                 |          |          |                 |             |              |          |          |          |           |          | 14          |            |          |                  |              |          |          |    |
| $I_{Lc1}$              |                   |                      |          |          |                |            |             |                      |          |                  |                 |          |          |                 |             | 20           |          |          |          |           |          |             |            |          |                  |              |          |          |    |
| $f_{SnowReduceLAI}$    |                   |                      |          | 23       |                |            |             |                      |          |                  |                 |          |          |                 |             |              |          |          |          |           |          |             |            |          |                  |              |          |          |    |
| $\rho_{o2, moss}$      |                   |                      |          |          |                |            |             |                      |          |                  |                 |          |          |                 |             |              |          |          |          |           |          |             |            |          |                  |              |          |          |    |
| $\rho_{o2, vasc}$      |                   |                      |          |          |                |            |             |                      |          |                  |                 |          |          |                 |             | 17           |          |          |          |           |          |             |            |          |                  |              |          |          |    |
| $\rho_{o1, vasc}$      |                   |                      |          |          |                |            |             |                      |          |                  |                 |          | 19       |                 |             |              |          |          |          |           |          |             |            |          |                  |              |          |          |    |
| $\rho_{mn, moss}$      |                   |                      |          |          |                |            |             |                      |          |                  |                 |          |          |                 |             |              |          |          |          |           |          |             |            | 28       |                  |              |          |          |    |
| $\rho_{mn, vasc}$      |                   |                      |          |          |                |            |             |                      |          |                  |                 |          |          |                 |             |              |          |          |          |           |          |             |            |          |                  |              |          |          | 17 |
| $\rho_{o1, moss}$      |                   |                      |          |          |                |            |             |                      |          |                  |                 |          |          |                 |             |              |          |          |          |           |          |             |            | 17       |                  |              |          |          |    |
| $E_L, moss$            |                   |                      |          |          |                |            |             |                      |          |                  |                 |          |          |                 |             |              |          |          |          |           |          |             |            |          |                  |              |          |          |    |
| $E_L, vasc$            |                   |                      |          |          |                |            |             |                      |          |                  |                 |          |          |                 |             |              |          |          |          |           |          |             |            |          |                  |              |          |          |    |
| $\alpha_{pvc, vasc}$   |                   |                      |          |          |                |            |             |                      |          |                  |                 |          |          |                 |             |              |          |          |          |           |          |             |            |          |                  |              |          |          |    |
| $\alpha_{pvc, vasc}$   |                   |                      |          |          | 32             | 30         |             |                      |          | 18               |                 |          |          |                 |             |              |          |          |          |           |          |             |            |          |                  |              |          |          |    |
| $\alpha_{pgrain}$      |                   |                      |          |          |                |            |             |                      |          |                  |                 |          |          |                 |             |              |          |          |          |           |          |             |            |          |                  |              |          |          |    |
| $T_{amean}$            |                   |                      |          |          |                |            |             |                      |          |                  |                 |          |          |                 |             |              |          |          |          |           |          |             |            |          |                  |              |          |          | 21 |
| $h_2$                  |                   |                      |          |          |                |            |             |                      |          |                  |                 |          |          | 19              |             |              |          |          |          |           |          |             |            |          |                  |              |          |          |    |
| $S_k$                  |                   |                      |          |          |                |            |             |                      |          |                  |                 | 19       |          |                 |             |              |          |          |          |           |          |             |            |          |                  |              |          |          |    |
| $Z_{0M, snow}$         |                   | 32                   |          |          |                |            |             |                      |          |                  |                 |          |          |                 |             |              |          |          |          |           |          |             |            |          |                  |              |          |          |    |
| $r_{alai}$             |                   | 30                   |          |          |                |            |             |                      |          |                  |                 |          |          |                 |             |              |          |          |          |           |          |             |            |          |                  |              |          |          |    |
| $r_{a, max, snow-1}$   |                   |                      |          |          |                |            |             |                      |          |                  |                 |          |          |                 |             |              |          |          |          |           |          |             |            |          |                  |              |          |          |    |
| $C_{H0, canopy}$       |                   | 18                   |          |          |                |            |             |                      |          |                  |                 |          |          |                 |             |              |          |          |          |           |          |             |            |          |                  |              |          |          |    |
| $\psi_{eg}$            |                   |                      |          |          |                |            |             |                      |          |                  |                 |          |          |                 |             |              |          |          |          |           |          |             |            |          |                  |              |          |          |    |
| $\rho_l$               |                   |                      |          |          |                |            |             |                      |          |                  |                 |          |          |                 |             |              |          |          |          |           |          |             |            |          |                  |              |          |          |    |
| $\psi_c$               |                   |                      |          | 19       |                |            |             |                      |          |                  |                 |          |          |                 |             |              |          |          |          |           |          |             |            |          |                  |              |          |          |    |
| $t_{WA}$               |                   |                      |          |          |                |            |             |                      |          |                  |                 |          |          |                 |             |              |          |          |          |           |          |             |            |          |                  |              |          |          |    |
| $g_{maxwin}$           |                   |                      |          |          |                |            |             |                      |          |                  |                 |          |          |                 |             |              |          |          |          |           |          |             |            |          |                  |              |          |          |    |
| $g_{max, moss}$        |                   |                      | 19       |          |                |            |             |                      |          |                  |                 |          |          |                 |             |              |          |          |          |           |          |             |            |          |                  |              |          |          |    |
| $g_{max, vasc}$        |                   |                      |          |          |                |            |             |                      |          |                  |                 |          |          |                 |             |              |          |          |          |           |          |             |            |          |                  |              |          |          |    |
| $d_p$                  | 16                |                      |          |          |                |            |             |                      |          |                  |                 |          |          |                 |             |              |          |          |          |           |          |             |            |          |                  |              |          |          |    |
| $\psi_a$               |                   |                      | 20       |          |                |            |             |                      |          |                  |                 |          |          |                 |             |              |          |          |          |           |          |             |            |          |                  |              |          |          |    |
| $h_{com}$              |                   |                      |          |          |                |            |             |                      |          |                  |                 |          |          |                 |             |              |          |          |          |           |          |             |            |          |                  |              |          |          |    |
| $T_{RainL}$            |                   |                      |          |          |                |            |             |                      |          |                  |                 |          |          |                 |             |              |          |          |          |           |          |             |            |          |                  |              |          |          |    |
| $m_T$                  |                   |                      |          |          |                |            |             |                      |          |                  |                 |          |          |                 |             |              |          |          |          |           |          |             |            |          |                  |              |          |          |    |
| $\rho_{smin}$          |                   |                      |          |          |                |            |             |                      |          |                  |                 |          |          |                 |             |              |          |          |          |           |          |             |            |          |                  |              |          |          |    |
| $S_{dl}$               |                   |                      |          |          |                |            |             |                      |          |                  |                 |          |          |                 |             |              |          |          |          |           |          |             |            |          |                  |              |          |          |    |
| $S_{dw}$               |                   |                      |          |          |                |            |             |                      |          |                  |                 |          |          |                 |             |              |          |          |          |           |          |             |            |          |                  |              |          |          |    |
| $f_{gh}$               |                   |                      |          |          |                |            |             |                      |          |                  |                 |          |          |                 |             |              |          |          |          |           |          |             |            |          |                  |              |          |          |    |
| $m_{Rmin}$             |                   |                      |          |          |                |            |             |                      |          |                  |                 |          |          |                 |             |              |          |          |          |           |          |             |            |          |                  |              |          |          |    |
| $\Delta Z_{cov}$       |                   |                      |          |          |                |            |             |                      |          |                  |                 |          |          |                 |             |              |          |          |          |           |          |             |            |          |                  |              |          |          |    |
| <b>Count</b>           | <b>1</b>          | <b>3</b>             | <b>3</b> | <b>2</b> | <b>1</b>       | <b>2</b>   | <b>2</b>    | <b>1</b>             | <b>5</b> | <b>2</b>         | <b>1</b>        | <b>2</b> | <b>5</b> | <b>0</b>        | <b>5</b>    | <b>1</b>     | <b>7</b> | <b>4</b> | <b>1</b> | <b>3</b>  | <b>1</b> | <b>0</b>    | <b>4</b>   | <b>0</b> | <b>1</b>         | <b>2</b>     | <b>2</b> |          |    |

2  
3  
4  
5  
6  
7  
8



1 **2 Supplementary Figures**

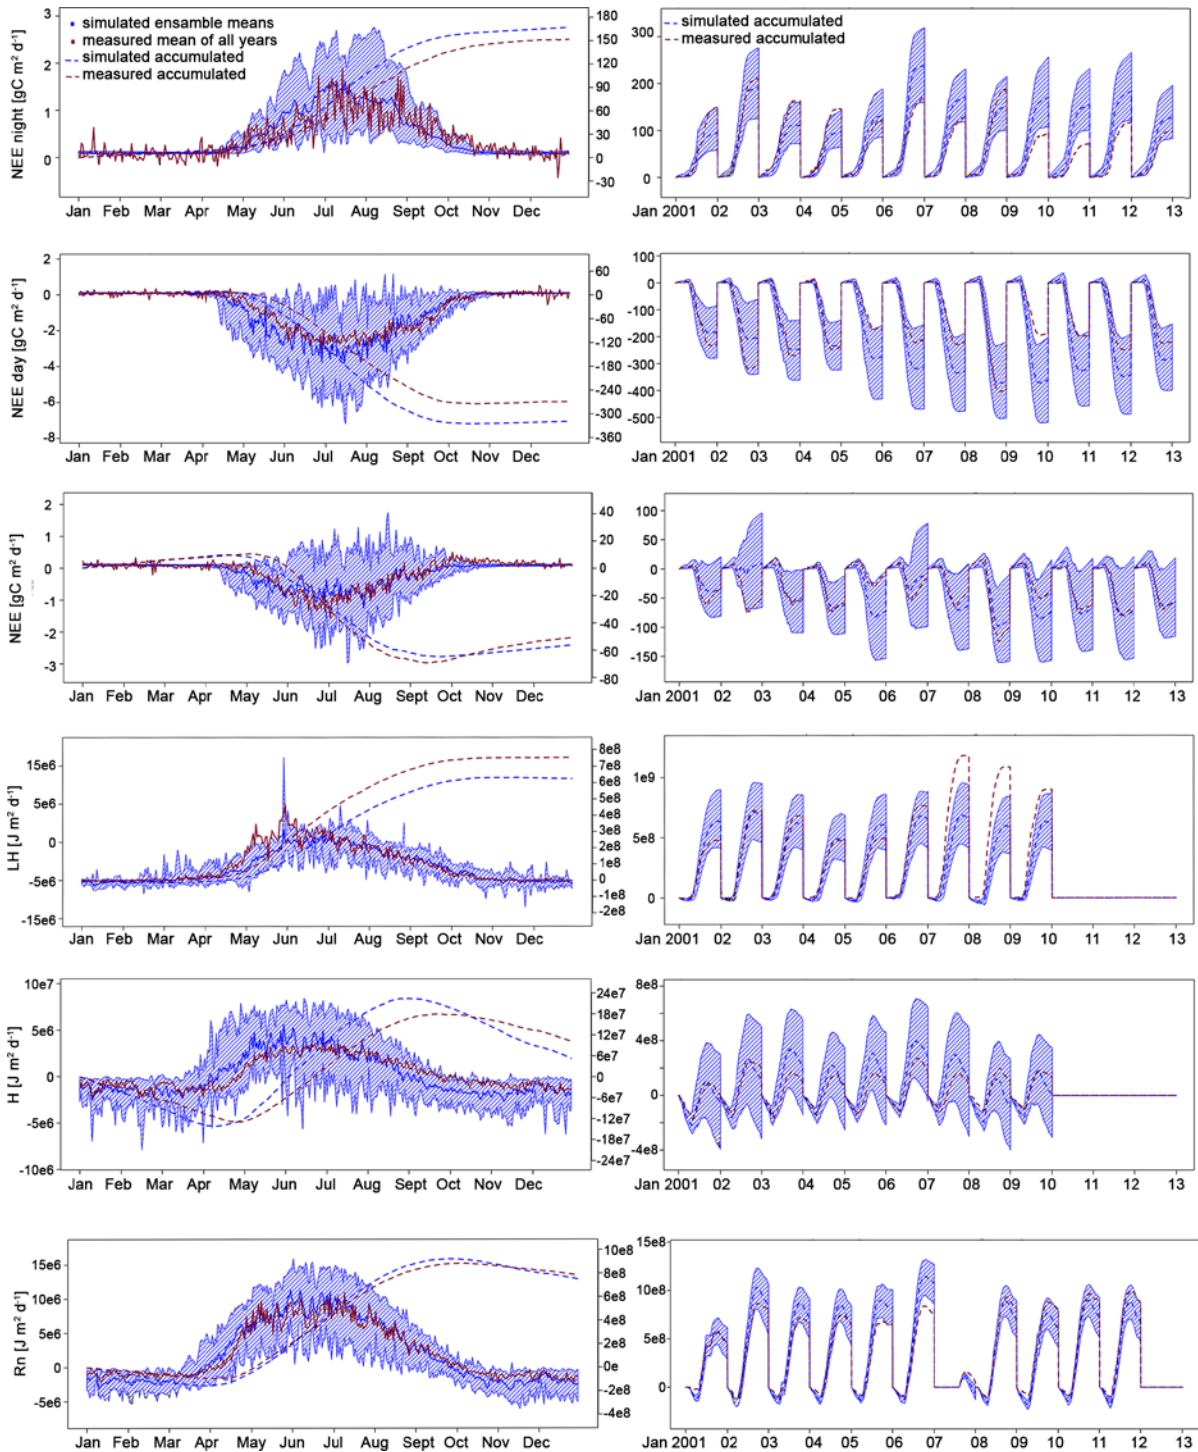

2  
3 Figure S1. Model fit to observations. Left column: simulated and measured mean of all years.  
4 Right column: cumulated values for each year.

5

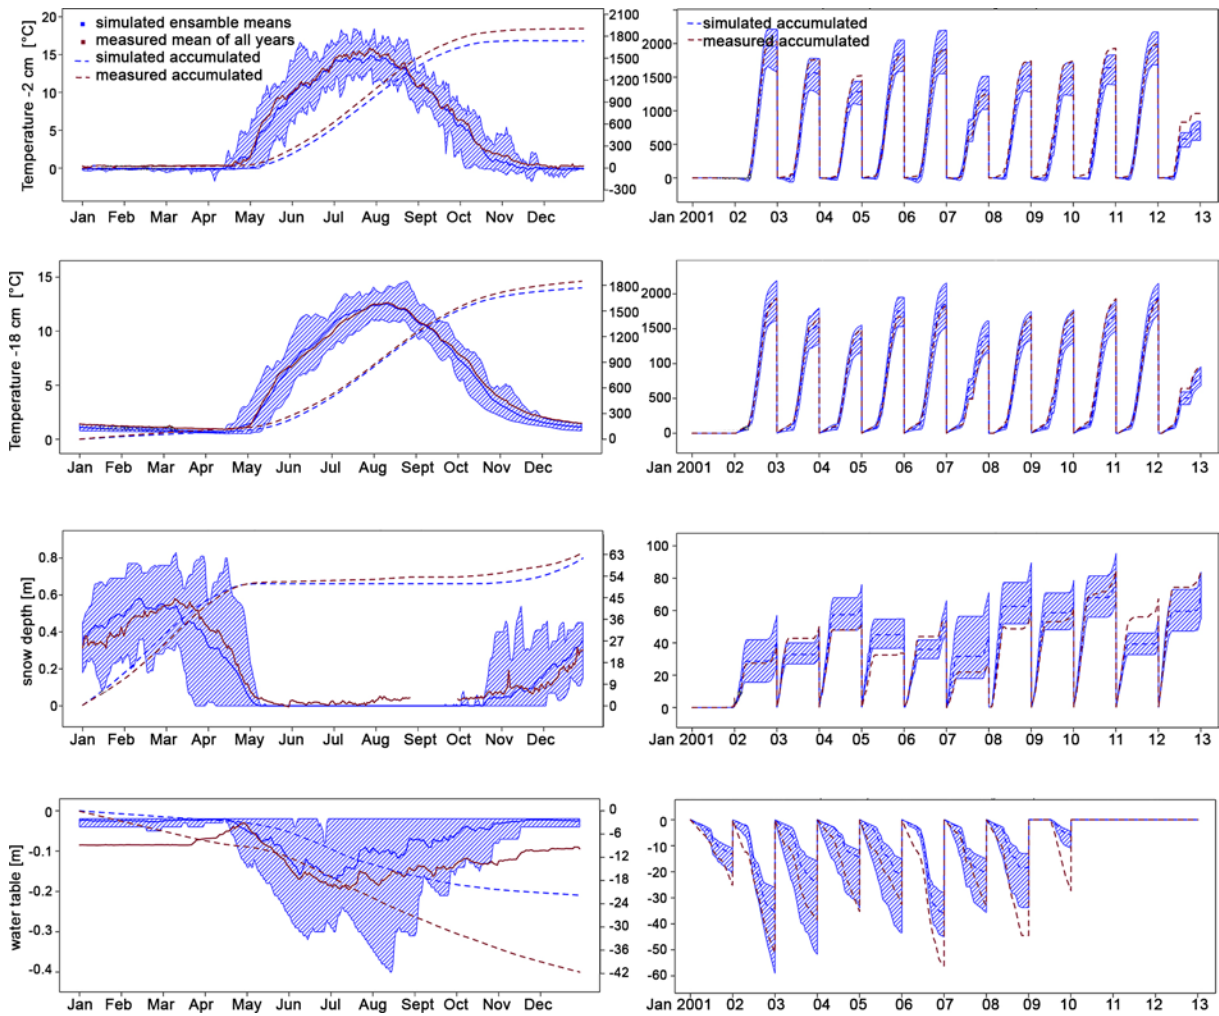

1  
2

3 Figure S1 continued: Model fit to observations. Left column: simulated and measured mean  
4 of all years. Right column: cumulated values for each year

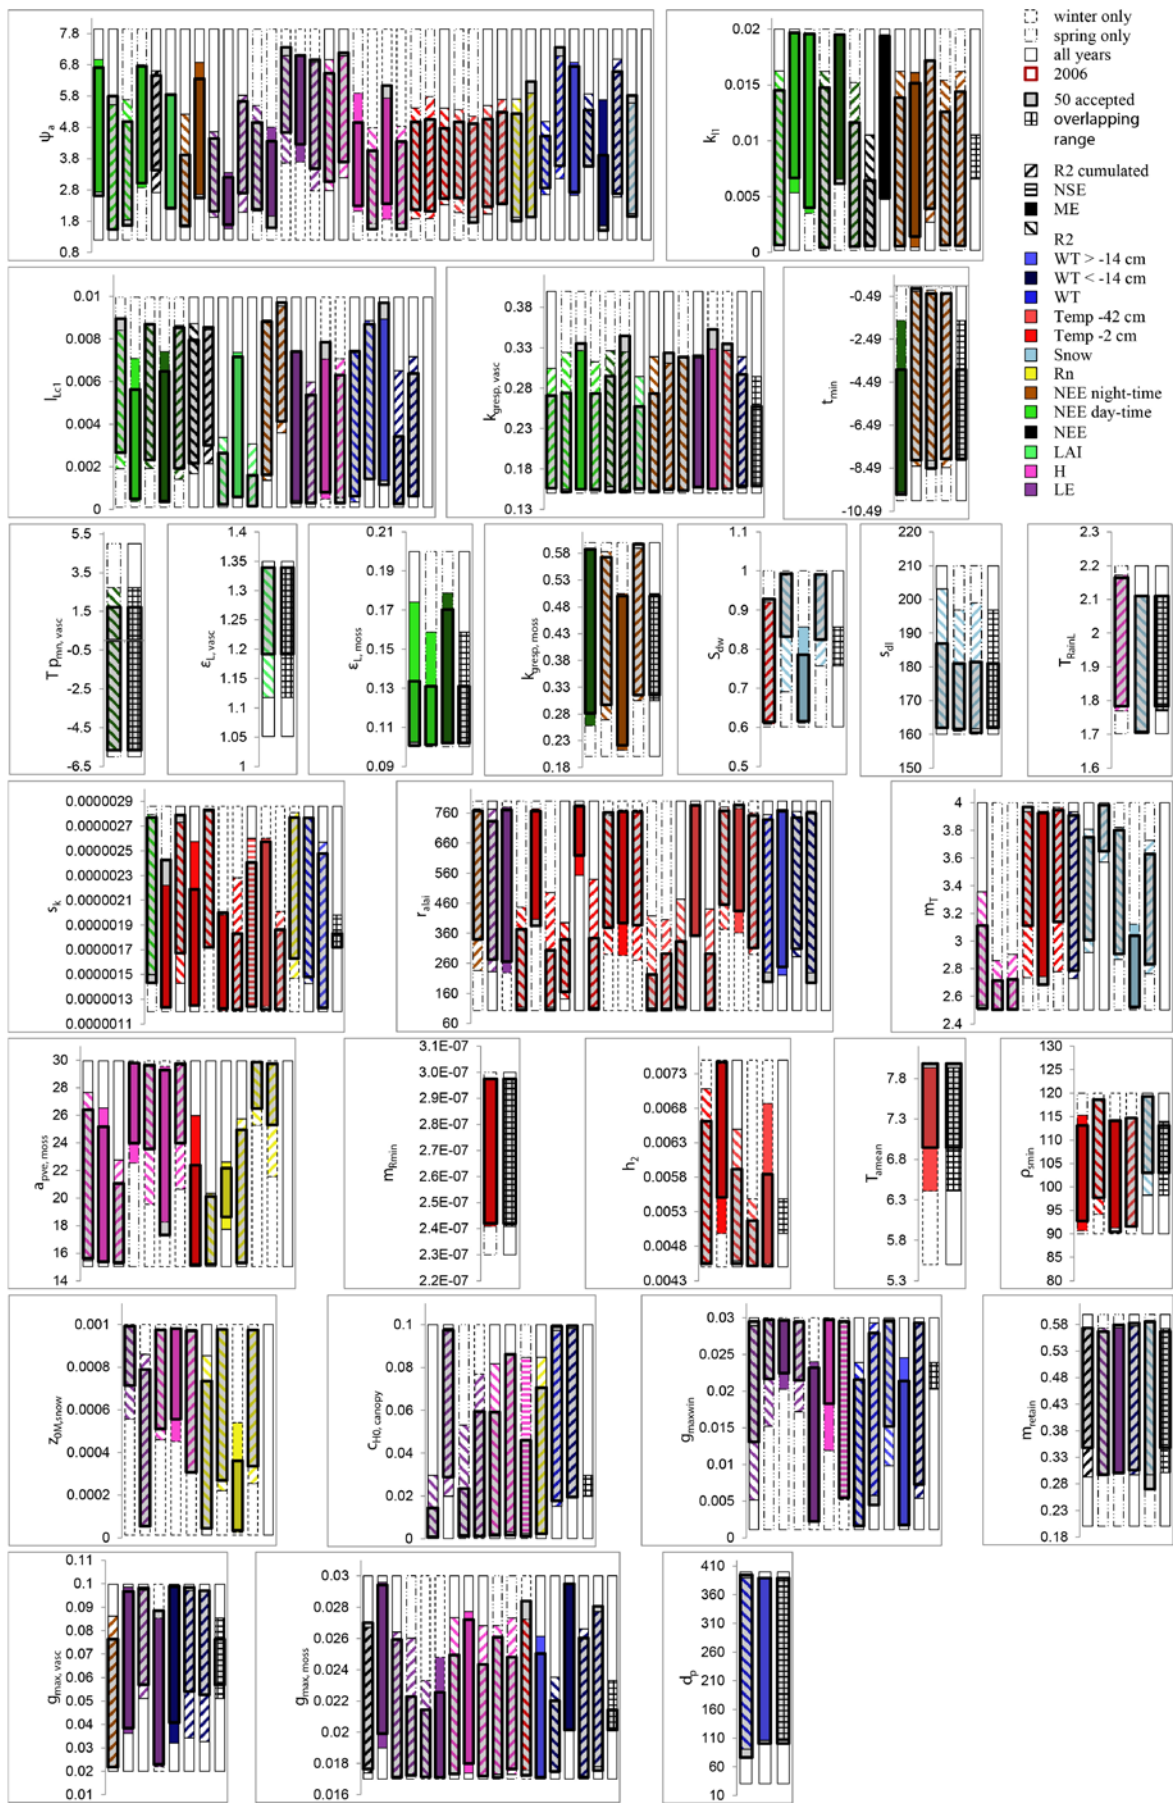

1

2 Figure S2. Accepted parameter ranges. The last bar in each bar chart shows the overlapping  
 3 range. If empty, ranges are not overlapping

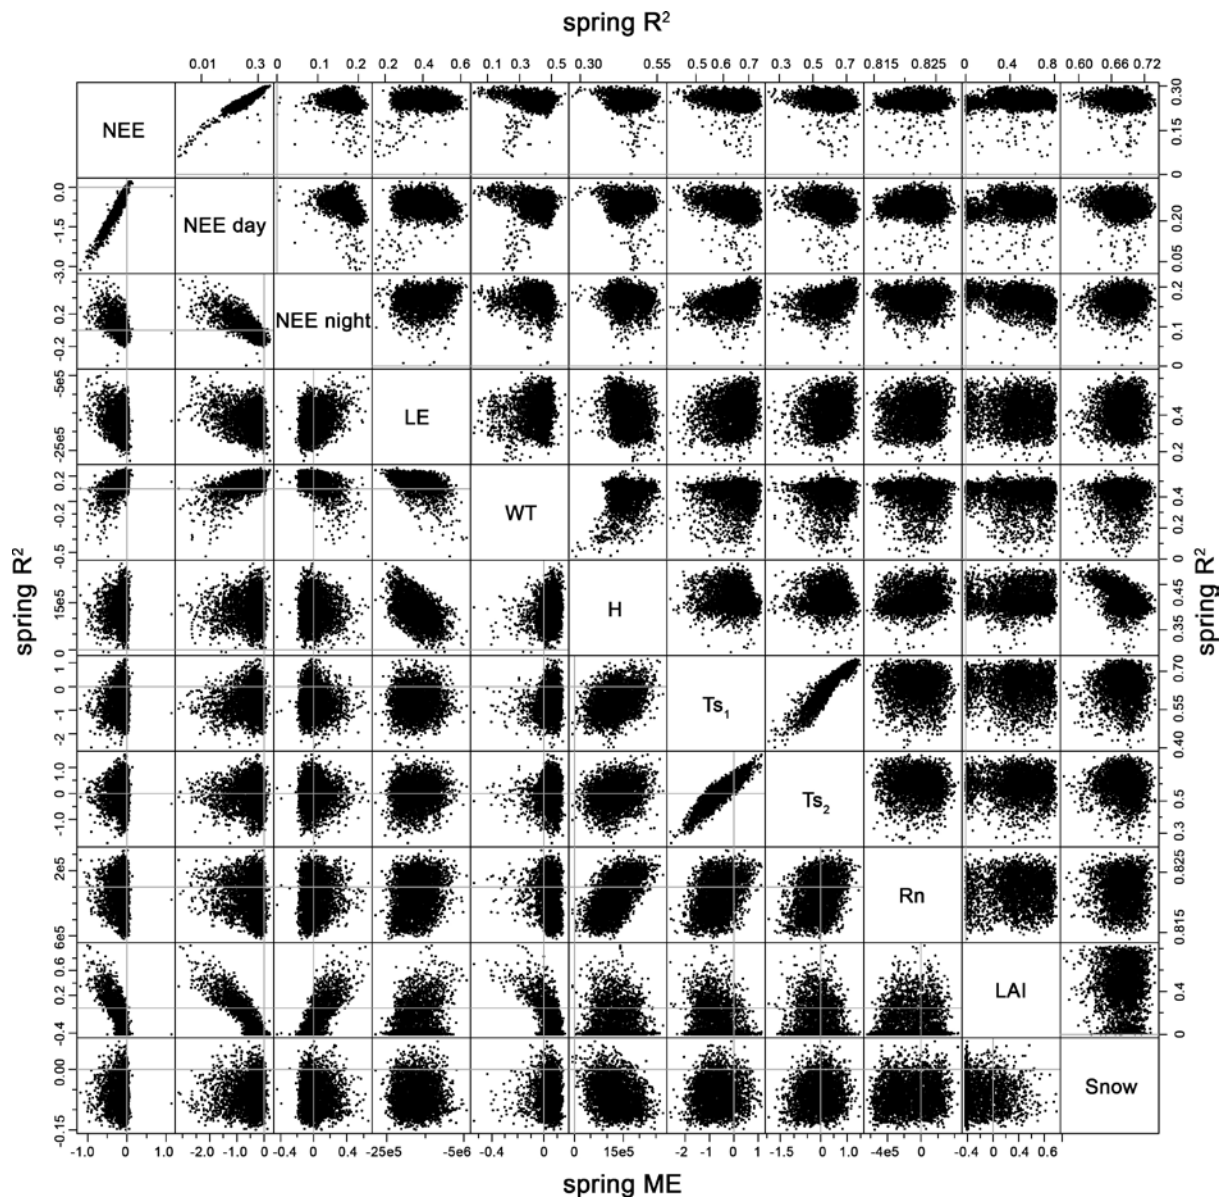

1

2 Figure S3. Correlations between performance indices in the prior distribution during spring  
 3 time only. Upper panel: R<sup>2</sup>, lower panel: ME. Each of the dots represents a parameter set.  
 4 Grey lines indicate the axes through zero.

5

6

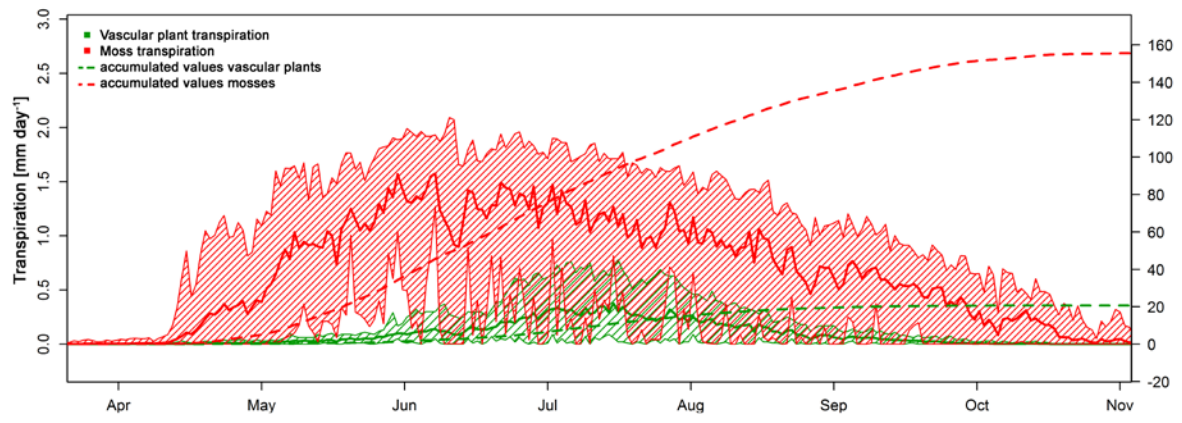

1

2 Figure S4. 12 year mean of transpiration from mosses and vascular plants. The hatched area  
 3 shows the range of the 51 runs with selected performance in NEE, the solid line its mean.

4

5

6



### 1 3 References

- 2 Axelsson, B. and Ågren, G.: Tree growth model (PT 1) - a development paper. Swedish  
3 Coniferous Forest Project. Swedish University of Agricultural Sciences, Department of  
4 Ecology and Environmental Research, Uppsala. Sweden, Internal Report 41, 79pp, 1976.
- 5 Berglund, E. R. and Mace, A. C.: Seasonal Albedo Variation of Black Spruce and Sphagnum-  
6 Sedge Bog Cover Types, *Journal of applied meteorology*, 806–812, 1972.
- 7 Brooks, R. H. and Corey, A. T.: Hydraulic Properties of Porous Media, *Hydrology Paper No.*  
8 *3*, Colorado State University, Fort Collins, Colorado, US, 27pp, 1964.
- 9 Clymo, R. S. and Hayward, P. M.: The Ecology of Sphagnum, in: *Bryophyte Ecology*, Smith,  
10 A. J. E. (Ed.), Springer Netherlands, 229–289, 1982.
- 11 Grace, J.: The Growth-Physiology of Moorland Plants in relation to their Aerial Environment.  
12 Ph.D. thesis, Univ. Sheffield, Sheffield, UK, 1973.
- 13 Granberg, G., Grip, H., Löfvenius, M. O., Sundh, I., Svensson, B. H., and Nilsson, M.: A  
14 simple model for simulation of water content, soil frost, and soil temperatures in boreal  
15 mixed mires, *Water Resour. Res.*, 31, 3371–3382, doi:10.1029/1999WR900216, 1999.
- 16 Jansson, P.-E., Karlberg, L.: Coupled heat and mass transfer model for soil–plant–atmosphere  
17 systems. Royal Institute of Technology, Stockholm, 484 pp., accessed: 17 November 2015  
18 <https://drive.google.com/file/d/0B0-WJKp0fmY CZ0JVeVgzRWFIBUk/view?pli=1>, 2010.
- 19 Kellner, E.: Surface energy fluxes and control of evapotranspiration from a Swedish  
20 Sphagnum mire, *Agricultural and Forest Meteorology*, 110, 101–123, doi:10.1016/S0168-  
21 1923(01)00283-0, 2001.
- 22 Kellner, E. and Lundin, L.-C.: Calibration of time domain reflectometry for water content in  
23 peat soil, *Nordic Hydrology*, 32, 315–332, 2001.
- 24 Kondratiev, K. Y., Mironova, Z. F., and Otto, A. N.: Spectral albedo of natural surfaces, pure  
25 and applied geophysics, 59, 207–216, 1964.
- 26 Körner, C.: *Alpine plant life: Functional plant ecology of high mountain ecosystems*,  
27 Springer, Berlin, New York, 338pp, 1999.
- 28 Kummerow, J. and Ellis, B. A.: Temperature effect on biomass production and root/shoot  
29 biomass ratios in two arctic sedges under controlled environmental conditions, *Bot.*, 62,  
30 2150–2153, doi:10.1139/b84-294, 1984.
- 31 Metzger, C., Jansson, P.-E., Lohila, A., Aurela, M., Eickenscheidt, T., Belelli-Marchesini, L.,  
32 Dinsmore, K. J., Drewer, J., van Huissteden, J., and Drösler, M.: CO<sub>2</sub> fluxes and  
33 ecosystem dynamics at five European treeless peatlands – merging data and process  
34 oriented modeling, *Biogeosciences*, 12, 125–146, doi:10.5194/bg-12-125-2015, 2015.
- 35 Päivänen, J.: Hydraulic conductivity and water retention in peat soils, *Acta Forestalia*  
36 *Fennica*, 129, 1973.
- 37 Petzold, D. E. and Rencz, A. N.: The albedo of selected subarctic surfaces, *Arctic and Alpine*  
38 *Research*, 393–398, 1975.
- 39 Ratkowsky, D. A., Olley, J., McMeekin, T. A., and Ball, A.: Relationship between  
40 temperature and growth rate of bacterial cultures, *Journal of Bacteriology*, 149, 1–5, 1982.
- 41 Rice, S. K., Aclander, L., and Hanson, D. T.: Do bryophyte shoot systems function like  
42 vascular plant leaves or canopies?: Functional trait relationships in Sphagnum mosses  
43 (Sphagnaceae): Functional trait relationships in Sphagnum mosses (Sphagnaceae),  
44 *American journal of botany*, 95, 1326–1330, doi:10.3332/ajb.0800019, 2008.
- 45 Shaw R.H. and Pereira, A.R.: Aerodynamic roughness of a plant canopy: a numerical  
46 experiment. *Agricultural Forest Meteorology*, 26: 51-65, 1982.
- 47 van de Weg, M. J., Fetcher, N., and Shaver, G.: Response of dark respiration to temperature  
48 in *Eriophorum vaginatum* from a 30-year-old transplant experiment in Alaska, *Plant*  
49 *Ecology & Diversity*, 6, 337–301, doi:10.1080/17560874.2012.729628, 2013.

- 1 Vermeij, I.: Relating phenology to the gross primary production in a boreal peatland, using  
2 the greenness index, MSc thesis Biology, Wageningen University, Wageningen, 2013.
- 3 Wohlfahrt, G., Bahn, M., Haubner, E., Horak, I., Michaeler, W., Rottmar, K., Tappeiner, U.,  
4 and Cernusca, A.: Inter-specific variation of the biochemical limitation to photosynthesis  
5 and related leaf traits of 30 species from mountain grassland ecosystems under different  
6 land use, *Plant, Cell and Environment*, 22, 1281–1296, 1999.
- 7 Zhao, W., Hidenori, T., and Zhao, H.: Estimation of vegetative surface albedo in the Kushiro  
8 Mire with Landsat TM data, *Chin. Geograph.Sc.*, 7, 278-288, doi:10.1007/s11769-997-  
9 0056-4, 1997.
